1 **Soil amendments and suppression of *Phytophthora* root rot in avocado (*Persea indica*)**

2 Qurrat Ul Ain Farooq<sup>1,2</sup>, Jen McComb<sup>1</sup>, Giles StJ. Hardy<sup>1</sup> and Treena Burgess<sup>1</sup>

3 Phytophthora Science and Management, Harry Butler Institute, Murdoch University, Perth,

4 WA, 6150, Australia

5 Institute of Agricultural Sciences, University of the Punjab, Lahore, Pakistan

6

7 **Corresponding author.** Q. Farooq (Annie) anniepkelegant@yahoo.com

8

9 **Short title** Suppression of *Phytophthora* root rot by soil amendments

10

11 **Keywords** soil additives, *Phytophthora* suppression, phosphite, glyphosate, metalaxyl.

12

13 **Abstract**

14 The ability of microbial or mineral-based soil additives to suppress root rot caused by  
15 *Phytophthora cinnamomi* was assessed. Phosphite and metalaxyl treatments for the control  
16 of disease, and glyphosate for weed control were also assessed. A treatment simulating  
17 avocado orchard conditions had chicken manure, wood mulch, and mulch from beneath  
18 trees in an avocado orchard added to the pots. Soil treatments (three probiotic and two  
19 mineral-based) were applied to 9-month-old saplings growing in containers in a  
20 glasshouse. After one-month, half of the plants of each treatment were inoculated with the  
21 pathogen. Three months after inoculation, plants were harvested and plant growth and root  
22 damage were measured. In the first experiment infestation with *P. cinnamomi* significantly  
23 reduced fine root dry weight in all plants except those in soil treated with one silicon-based  
24 mineral mulch. Visible root damage was higher in plants treated with probiotics. In this  
25 experiment, and in a repeat experiment the reduction of fine root damage achieved by  
26 spraying plants with phosphite or addition of a silica based mineral mulch was similar.  
27 Phosphite was preferable to metalaxyl as a chemical treatment, as the latter reduced shoot  
28 and root growth of non-infected plants. Glyphosate treatment of wheat seedlings growing  
29 in the pots with the avocados reduced shoot and fine root growth of both non-infected and  
30 infected plants. These observations need to be confirmed under field conditions.

31

## 32 **Introduction**

33 Phytophthora root rot caused by the oomycete *Phytophthora cinnamomi* is one of the  
34 worst avocado diseases worldwide. This pathogen attacks the feeder roots of avocado  
35 trees, and if left untreated can result in the death of trees and high economic losses  
36 (Reeksting et al. 2016; Ramirez-Gil et al. 2017). Management strategies include  
37 controlling movement of people, livestock and vehicles, the use of chemicals, soil  
38 additives and development of *P. cinnamomi*-tolerant cultivars or rootstocks (D'Souza et al.  
39 2005). The most robust and environmentally benign methods are integrated management  
40 approaches (Pegg and Whaley 1987; Wolstenholme and Sheard 2010) including selection  
41 of tolerant varieties, application of organic fertilizers and mulches, addition of cultured  
42 microbial antagonistic agents, inorganic nutrition and liming, irrigation management and  
43 fungicide application (Wolstenholme and Sheard 2010; Pegg 2010). Phosphite is the most  
44 commonly used chemical for control of *Phytophthora* root rot caused by *P. cinnamomi* in  
45 agricultural, forestry, horticultural and natural ecosystems worldwide (Pegg et al. 1987;  
46 Hardy et al. 2001; Shearer and Fairman 2007; King et al. 2010; Scott et al. 2015; Ramírez-  
47 Gil et al. 2017; Masikane et al. 2020). It is the only chemical effective against this disease  
48 as it acts directly on the pathogen as well as increasing the plants' resistance to the  
49 pathogen (King et al. 2010). However, prolonged use of phosphite increases the potential  
50 for development of phosphite resistance in the pathogen (Dobrowolski et al. 2008).  
51 Moreover, use of agrochemicals may have a negative effect on environment through  
52 detrimental effects on beneficial soil microbes, and disruption of soil ecology (Hardy et al.  
53 2001; Gill and Garg 2014; Xi et al. 2020).

54 Commercial microbial soil probiotic additives/conditioners comprising proprietary  
55 mixtures of microbial species are receiving increasing attention with the global demand for  
56 these products growing at 10% each year (Berg 2009; Song et al. 2012). The most

57 promising biocontrol beneficial microbial organisms, effective against several foliar and  
58 soil-borne diseases are the Proteobacteria (*Bacillus* spp.), actinobacteria (*Streptomyces*  
59 spp.), the fluorescent pseudomonads (e.g. *Firmicutes*), and fungi (e.g. non-pathogenic  
60 *Fusarium* spp. and *Trichoderma* spp.) (Raaijmakers et al. 2009; Bhattacharjee and Dey  
61 2014).

62 Mineral soil conditioners, particularly silicon-based mulches, have also shown  
63 encouraging outcomes for plant disease control and growth in agricultural crops (Pozza et  
64 al. 2015; Tubana et al. 2016). They have been effective for the control of anthracnose  
65 (*Colletotrichum lindemuthianum*) (Moraes et al. 2009) and powdery mildew  
66 (*Sphaerotheca fuliginea*) (Samuels et al. 1991; Menzies et al. 1992; Belanger et al. 2003).  
67 Silica is known to impact on a wide range of plant metabolic processes, and also to affect  
68 the soil microbiota, though less is known about the latter (Rajput et al. 2021).

69 No information is currently available on the comparative effectiveness of soil probiotics  
70 developed commercially for management of *Phytophthora* in avocado. This study presents  
71 information on the effectiveness spraying with phosphite, compared with use of organic  
72 mulches, commercial soil probiotics and silicon-based mineral mulches on root damage in  
73 avocado caused by *P. cinnamomi*. It also investigates whether a commonly used herbicide,  
74 glyphosate may exacerbate *Phytophthora* root damage.

## 75 **Methods**

### 76 **Plant Material**

77 Avocados (cv. Reed) were grown from seed, initially in potting mix (Richgro Garden  
78 Products, Australia). Nine-month-old plants were transplanted into 220 x 330 mm (15 L)

79 free-draining polybags (Garden City Plastics, Forrestfield, Western Australia) for the first  
80 experiment, and for second experiment 150 x 380 mm (7 L) polybags were used.

### 81 **Soil and growing conditions**

82 In experiment 1 Channybearup yellow brown clay loam soil was sourced from Manjimup  
83 Western Australia (WA). It is moderately well draining and has a high-water holding  
84 capacity. It was used in a 1:4 ratio of soil: coarse perlite (Perlite and Vermiculite  
85 Company, Myaree, WA). For the repeat experiment, a clay loamy soil was collected from  
86 Carabooda, Western Australia (WA). It was moderately well drained with good porosity  
87 which was mixed with river sand in ratio of 1:1. Both soils are known to be conducive to  
88 *Phytophthora* as native vegetation or avocado orchards on these soils suffer from  
89 phytophthora dieback but both soils were determined to be free of *P. cinnamomi* through  
90 standard baiting of the soil (Aghighi et al. 2016; Simamora et al. 2018). Two inoculation  
91 tubes (25 mm dia x 20 cm long) were placed in each bag when plants were potted to  
92 minimise the chance of damaging roots during the insertion of the inoculation plugs. Plants  
93 were watered daily to container capacity. Plants were placed on benches in a completely  
94 randomized design in evaporative cooled glasshouse maintained at 25-27 °C. All had  
95 weekly applications of liquid Thrive for fruits (Yates, Australia), (4gm/L, 300-400ml/pot)  
96 and 5ml/L Eco oil (Organic crop protectant Pty. Ltd., NSW, Australia) was sprayed on  
97 foliage and the soil surface when required for insect control.

### 98 **Treatments**

99 There were eleven treatments in Experiment 1, and treatments 1, 3, 4, 7, 8,10 were  
100 repeated in experiment 2.

101 Treatment 1 had no additives.

102 Treatments 2-11 had 50 g of well decomposed chicken manure applied monthly and 200  
103 g/pot jarrah (*Eucalyptus marginata*) wood mulch placed on the surface at the time of  
104 transplanting. In experiment 2, in the smaller pots, half these amounts were applied.

105 Treatments 3-11 had 150 g of avocado mulch added at the time of transplanting for  
106 experiment 1, (75g was applied in experiment 2). Avocado orchard mulch was collected  
107 from a 20-year-old orchard in which *P. cinnamomi* is controlled by phosphite spray  
108 (Delroy Orchards, Pemberton, WA), application of decomposed wood mulch, chicken  
109 manure, fertigation with standard fertilisers and fish emulsion. The jarrah wood mulch and  
110 the avocado orchard mulch were determined to be free of *P. cinnamomi* through baiting.

111 Treatment 4 had weekly application of a 25% concentration of a microbial soil conditioner  
112 known to include *Lactobacillus*, *Bacillus*, *Saccharomyces*, *Acetobacter* and *Azotobacter*.

113 Treatment 5 had an additive (conc. 1:500) sprayed to foliage to run-off and applied to soil  
114 to field capacity (immediately after potting, and after inoculation). This additive contained  
115 humates and an organic chemical.

116 Treatment 6 had applications of two additives that contained a mixture of *Bacillus* species.  
117 One was applied at 50 g/pot at the time of transplanting, and the second at 2.5 ml/pot every  
118 6 weeks.

119 Treatments 7 had 200 g/pot for experiment 1 and 100 g/pot for experiment 2 of 'Mineral  
120 Mulch', a mulch containing calcium, silicon ([www.mineralmulch.com](http://www.mineralmulch.com))

121 Treatment 8 had applications of mineral based additives containing silica and sulphur. At  
122 the time of transplanting 2 g/pot of Dolomite (calcium magnesium carbonate) and 1.5  
123 g/pot of Humus 400' (derived from lignite; for inorganic analysis available:

124 ecogrowth.com.au/products/humus400) was added. Then every fortnight 5 g/pot of ‘Eco-  
125 prime’ (chemical analysis available: ecogrowth.com.au/products/eco-prime-avocado) and  
126 0.5 ml of ‘Eco X’ (containing silica, calcium and sulphur) was added for both experiments.

127

128 Treatment 9 had wheat seeds planted at the time of transplanting. When four weeks old  
129 the wheat seedlings were sprayed with ‘Roundup’ (active ingredients: 7.2g/L glyphosphate  
130 and 21g/L Nonanoic acid manufactured by Evergreen Garden Care Australia Pty. Ltd.,  
131 NSW, Australia) to run-off) (the stems of the avocados were protected with aluminium  
132 foil). In avocado orchards glyphosate is routinely used to control weeds (Nartvaranant et  
133 al. 2004).

134 Treatments 10 had plants sprayed with fungicide for *P. cinnamomi* control: Agri-Fos 600  
135 (active ingredient: 600g/L phosphorus acid manufactured by Nufarm Australia Ltd,  
136 Western Australia) sprayed according to manufacturer manual on the avocado plants to  
137 runoff. Phosphite was applied after transplanting and repeated after a further 10 days.

138 Treatment 11 was also a fungicide treatment: Ridomil Gold (active ingredient: 25g/kg  
139 Metalaxyl-M; Syngenta Australia Pty Ltd, NSW, Australia) was applied as a soil drench at  
140 the recommended rate. Metalaxyl was applied 2 weeks before plants were inoculated with  
141 *Phytophthora*, then 6 weeks after inoculation.

#### 142 **Inoculum production and inoculation**

143 Branches of live tagasaste (*Chamaecytisus palmensis*) (1-2 cm dia.) were cut into  
144 approximately 2 cm pieces. Two hundred plugs were placed in each of ten 2 L conical  
145 flasks. The plugs were soaked in distilled water overnight, then rinsed. Distilled water  
146 (approx. 50-70 mL, sufficient to cover the bottom of the flask) was added, the flask was

147 plugged with a non-absorbent cotton plug and autoclaved at 121 °C for 30 min, then  
148 allowed to cool to room temperature and the process was repeated after 24 h. Two Petri  
149 plates of *P. cinnamomi* (isolate MP 94-48 from the Centre for Phytophthora Science and  
150 Management culture collection, Genbank Accession number for ITS gene region is  
151 JX113294), cultured on a V8 (vegetable juice) agar medium for 7 days at 25 °C in the  
152 dark, were cut into 1 cm squares and aseptically added to the conical flasks. The flasks  
153 were shaken to evenly distribute the agar plugs and incubated at 25 °C in the dark. Flasks  
154 were incubated for 4 weeks and shaken weekly to obtain uniform colonisation of the  
155 inoculum plugs.

156 All treatments consisted of 10 non-inoculated controls and 10 infested plants inoculated  
157 with *P. cinnamomi*. Plants were inoculated by insertion of two *P. cinnamomi* colonised  
158 plugs to a depth of 10 cm into each of the two holes created after removal of the  
159 inoculation tubes. Similarly, for the control plants, non-colonised plugs were inserted to  
160 the same depth in the holes after removal of tubes in non-inoculated pots. Three weeks  
161 after inoculation, all the plant containers were flooded for 24 h to stimulate the release of  
162 zoospores.

### 163 **Harvest**

164 Twelve weeks after inoculation with *P. cinnamomi* the plants were harvested. In both  
165 experiments, shoots were excised then dried in an oven at 60 °C to constant dry weight.  
166 Roots were washed free of soil and the visual damage caused by the pathogen scored using  
167 the rankings 1= healthy roots, 2= 1-25% damage, 3= 26-50% damage, 4= 51-75% damage  
168 and 5= 76-100% damage. Fine roots were separated, and the dry weight of fine and coarse  
169 roots recorded. Total root dry weights were calculated by adding fine and coarse root dry



170 weights. Re-isolation of *P. cinnamomi* was undertaken using a randomly chosen plant in  
171 each treatment to confirm that the inoculation caused disease.

172

## 173 **Data analysis**

174 To check the effect of different treatments on the control of damage caused by *P.*  
175 *cinnamomi*, data for shoot dry weight, total root dry weight and fine root dry weight, these  
176 data were analysed using a linear model with terms for treatment, + and - *P. cinnamomi*,  
177 and their interactions. Homoscedasticity was assessed by plotting residuals vs fitted values  
178 and normality of residuals were assessed using q-q plots. Duncan multiples range test was  
179 used to assess the significance between all pairs of treatments /+,- *P. cinnamomi*  
180 combinations. The qualitative data on root damage for each treatment was assessed  
181 separately using Chi square tests. All the data analyses were conducted and bar graphs  
182 were generated in R software.

## 183 **Results**

### 184 **Shoot dry weight**

185 In both experiments all seedlings were alive at the time of harvest and there was no  
186 evidence of wilt associated with the presence of *Phytophthora*. The first experiment for  
187 non-infested plants highest total shoot dry weight was recorded for plants receiving  
188 phosphite (T10) and this was statistically significantly higher than values for treatments  
189 with metalaxyl (T11) or glyphosate (T9) (Fig 2a). Following infestation with *Phytophthora*  
190 only plants treated with phosphite showed a significant fall in shoot dry weight (Fig 2a).

191 When selected treatments were repeated, there was no significant difference in shoot dry  
192 weight of treatments not infested with *Phytophthora*, while in infested plants shoot dry  
193 weight was highest for plants treated with mineral mulch 1 (T7) or phosphite (T10), but  
194 there was no statistical difference between these weights and the other treatments (Fig 2b).

195 There was a significant reduction of shoot dry weight following infection in the treatments  
196 with probiotic 1 (T4) or mineral mulch 2 (T8) (Fig 2a).

### 197 **Total root dry weight**

198 In the first experiment for non- infested plants highest total root weight was recorded for  
199 plants receiving mineral mulch 2 (T8) but this was only statistically significantly higher  
200 than values for treatments with mineral mulch 1 (T7) metalaxyl (T11) or glyphosate (T9)  
201 (Fig 3a). In the repeat experiment total root dry weight in non-infested plants was  
202 significantly higher in treatments with probiotic 1 (T4), mineral mulch 1 (T7) and  
203 phosphite (T10) than in the treatment with avocado mulch or with no additives (Fig 3b).  
204 When soil was infested with *Phytophthora* in the first experiment there was a significant  
205 drop in total root weight for the treatment with no additives or with only chicken manure,  
206 but no significant reduction in the other treatments (Fig 3a).

207 In repeat experiment, in both non-infested, and infested soil, probiotic 1, mineral mulch  
208 and phosphite showed more root growth with greatest growth being observed in plants  
209 from the mineral mulch 1 and phosphite treatments. However, the reduction in root dry  
210 weight after infection was significant in all treatments (Fig 3b).

### 211 **Fine root dry weight**

212 For the non- infested treatments, fine root dry weight was not significantly increased by  
213 the additional of any soil additives (T4-T8) above that of adding avocado orchard mulch  
214 alone (T3) (Fig. 4a). For non-infested plants, phosphite (T10) also had no impact on the  
215 fine root dry weight, however, metalaxyl (T11) and glyphosate (T9) both resulted in a  
216 significant reduction in the fine root dry weight (Fig 4a). The fine root dry weight was  
217 reduced by infection with *P. cinnamomi* in all treatments except T7 (mineral mulch1) (Fig.

218 4a). This reduction was significant in the treatments with no mulch, chicken manure (T2),  
219 organic mulch (T3), T4 (probiotic conditioner 1) and T5 (probiotic conditioner 2) (Fig 4a).  
220 The result was not significant for any of the other treatment pairs suggesting that the other  
221 additives (T6, T7 and T8, T9, T10, T11) reduced the impact of *Phytophthora* on the loss of  
222 fine roots. This was most striking for mineral mulch 1 (T7), where the fine root weight of  
223 infested and non-infested seedlings was the same (Fig. 4a).

224 In the repeat experiment in non-infested soil, application of mineral mulch 1 (T7) or  
225 phosphite (T10) gave the highest fine root dry weight. For plants grown in infested soil,  
226 treatment with mineral mulch 1(T7) or probiotic conditioner 1(T4) gave results equivalent  
227 to treatment with phosphite with the highest fine root weight being recorded for plants  
228 treatment with mineral mulch 1 (T7) (Fig 4b). However, after infection significant  
229 reduction in fine root dry weight was observed in all other treatments except no mulch  
230 (T1) (Fig 4b).

### 231 **Root damage**

232 There was no significant difference in the root damage rating between treatments for non-  
233 infested plants but significantly ( $P < 0.05$ ) more root damage in all treatments infested with  
234 *P. cinnamomi* compared to their respective non-infested controls (Chi square test) in both  
235 experiments (Figs. 5a, b). In experiment 1 for infested plants there was greater root  
236 damage in treatments with probiotic conditioners (T4, 5, 6) and the glyphosate treatment.  
237 Infested plants given T8 (Ecoprime, a silicon-based mineral conditioner) had less damage  
238 than those in T3 (avocado orchard mulch) while in mineral mulch (T7) damage of infested  
239 plants was similar to that seen in avocado orchard mulch (T3). Amongst the pesticide  
240 treatments, glyphosate application (T9) resulted in more root damage of infested plants  
241 than infested plants treated with phosphite (T10) and metalaxyl (T11). Application of

242 avocado mulch (T3), or mineral mulch (T7, T8) resulted in similar or less  
243 damage than that seen on plants sprayed with phosphite (T10) (Fig 5a).

244 In the second experiment overall root damage was higher in both non infested and infested  
245 treatments than in experiment 1. In infested soil the least root damage was in plants with  
246 mineral mulch 1 or phosphite. This reduction was significantly less compared to plants  
247 with no mulch (T1), avocado orchard mulch (T3) or mineral mulch 2 (T8) (Fig 5 b).

## 248 **Discussion**

249 In these experiments although fine root weight was reduced by up to 50% in infested  
250 plants in some treatments, and 51-75% of the roots showed visible damage, shoots were  
251 healthy and no wilting was observed. This is probably because plants were grown under  
252 glasshouse conditions with adequate daily watering. Under field conditions, similar root  
253 damage could be expected to have much greater impact on total dry weight. In addition, if  
254 the glasshouse experiment had utilized younger plants with less woody roots  
255 (Rodriguez-Molina et al. 2002), or if the plants had been allowed to grow for longer after  
256 inoculation (Faber et al. 2000), there may have been a greater impact of *P. cinnamomi* on  
257 total dry weights and more divergence in effectiveness of the different treatments as  
258 assessed by total dry weight. As *P. cinnamomi* has its initial impact on fine roots, it is  
259 considered that the most accurate assessment of the effectiveness of the treatments applied  
260 here is seen through the data on total root dry weight, fine root dry weight and root  
261 damage.

262

### 263 **Effect of treatments on plants in soil infested with *P. cinnamomi***

264 The addition of avocado orchard mulch (T3) resulted in a small improvement in root dry  
265 weight compared to those without (T1 and T2) in experiment 1 but not in the repeat

266 experiment. Treatment 3 is the closest equivalent to conditions in an avocado orchard in  
267 these pot experiments. No consistent beneficial effects of other soil additives on total root  
268 dry weight, fine root dry weight and root damage were seen. A possible exception is  
269 mineral mulch (T7), for which total root dry weight and fine root dry weight was not  
270 reduced by *P. cinnamomi* and there was less visible root damage than in other treatments.  
271 In the second experiment avocado mulch gave no improvement, but addition of probiotic 1  
272 (T4), mineral mulch (T7) or phosphite (T10) increased both root total weight and fine root  
273 weight. Visible root damage was increased by addition of treatments to the avocado mulch  
274 (T3) treatment except for mineral mulch (T7). In experiment 2 mineral mulch (T7) showed  
275 the lowest damage. Mineral mulch 1 (T7) contains silicon, which is known to improve root  
276 growth and increase defence mechanisms of roots when infected with *Phytophthora*  
277 (Bekker et al. 2006; Bekker et al. 2007; Bekker 2011; Dann and Le 2017).

#### 278 **Effect of the treatments on roots of non-infected plants**

279 In experiment 1 no treatment significantly affected total root dry weight, fine root dry  
280 weight, or visible rot damage in any non-infested treatment. In the second experiment total  
281 root dry weight and fine root dry weight was increased by application of probiotic (T4),  
282 mineral mulch (T7 & T8), or spraying plants with phosphite (T10). Visible root damage  
283 was similar in all treatments. The soils were very similar in the two experiments but use of  
284 smaller pots, and sand rather than perlite in the mix for experiment 2, resulted in a greater  
285 root mass in the non-infested control treatment with no additives (T1) than in experiment  
286 1, and conditions more conducive for *Phytophthora* as seen by the higher level of fine root  
287 damage. In experiment 2 the conditions were more suitable for detection of the effects of  
288 additional soil additives on root growth and reduction of *Phytophthora* root damage.  
289 The addition of mineral mulch and phosphite had positive effect on the growth of non-  
290 infected plants and improved the root biomass. The silicon-based mineral mulch may act

291 as fertilizer and improve the availability of micronutrients and cation exchange activity,  
292 and reduce the excess uptake of Fe, Mn and Al (Etesami and Jeong 2018; Etesami 2018)  
293 and thus improve growth of shoots and roots (Al-Garni et al. 2019). Phosphite may also  
294 act as fertilizer and stimulate the root growth (Ramirez-Gil et al. 2017).

### 295 **The effect of fungicides and an herbicide**

296 In the current experiment it appeared that glyphosate use may worsen disease symptoms.  
297 (T11). Although no glyphosate was sprayed directly on the avocado plants, (it was used to  
298 kill a lawn of wheat growing in the pots) it reduced both total and fine root dry weight and  
299 there was a high level of root damage when *P. cinnamomi* was present (T11). The use of  
300 glyphosate in orchards may be damaging to avocado trees, possibly as it may result in  
301 mineral deficiencies which in turn increase disease susceptibility (Kremer et al. 2009;  
302 Zobiolo et al. 2010; Zobiolo et al. 2011). It may also be detrimental to beneficial  
303 rhizosphere microbes (Zobiolo et al. 2011).

304 Control of *P. cinnamomi* by phosphite spray was no greater than the control seen in plants  
305 treated only with avocado orchard mulch. Metalaxyl had a greater detrimental effect on  
306 overall growth specially shoot growth of non-inoculated plants than phosphite. It has been  
307 observed that the ability of avocado trees to resist *P. cinnamomi* may increase with the age  
308 of an orchard (Develey-Riviere and Galiana 2007), and with the build-up of soil organic  
309 matter from leaf litter (Schadler et al. 2010). Leaf litter together with organic matter in  
310 particular well decomposed chick manure raised microbial activity and soil pH which in  
311 return significantly reduced the *P. cinnamomi* survival (Aryantha et al. 2000; Konam and  
312 Guest 2002). As soil microflora were not studied, it is possible that the proprietary  
313 microbial soil additives increased soil microflora populations, but they had no effect on *P.*  
314 *cinnamomi* beyond those provided by avocado orchard mulch. The avocado orchard mulch

315 may either contain beneficial microbial consortia, and/or possess properties that enhance  
316 their growth.

## 317 **Conclusions**

318 Although the experiment attempted to simulate the conditions of an orchard, it is difficult  
319 to exactly replicate orchard conditions in a container trial in glasshouse, and to be sure that  
320 the soil additives will have similar effects in the field. Temperature regimes, water  
321 retention, aeration, and surface evaporation are factors that might have different effects on  
322 abiotic conditions and thus microbiota in pots and in the field (Poorter et al. 2016). In  
323 particular, the microbes included in the probiotics may not multiply and persist as well  
324 under container conditions as in the field.

325 Control methods that reduce the use of chemicals or avoid the build-up of resistance to  
326 phosphite or fungicides are highly desirable for commercial horticulture. In the current  
327 study, the application of a number of soil additives to containerised avocado plants under  
328 glasshouse conditions indicated that avocado orchard mulch was beneficial in reducing  
329 *Phytophthora* root damage. Further control may be possible through the application of a  
330 silicon based mineral mulch. Probiotic conditioners did not improve disease control. The  
331 silicon content of the mineral mulch may enhance the plants defence mechanisms against  
332 the pathogen. Future experiments will investigate the effect of these treatments on the soil  
333 microbiome. It was also shown that application of glyphosate for weed control damages  
334 avocado roots. If chemical control of *Phytophthora* is necessary, phosphite is better if  
335 applied at recommended rates (Gilardi et al. 2020) than metalaxyl as it has less detrimental  
336 effects on overall plant growth. *Phytophthora* resistant isolates developed faster in  
337 metalaxyl than in phosphite treated plants, as the former chemical has a targeted mode of  
338 action (Browne and Viveros 2005), whilst phosphite does not (McDonald et al. 2001;



339 Browne and Viveros 2005). Under glasshouse conditions, none of the soil additives  
340 improved growth of potted avocado plants, or were more effective against *P. cinnamomi*  
341 than treatments simulating current silvicultural methods (application of chicken manure,  
342 wood mulch and retention of leaf litter) used by avocado growers in their orchards.  
343 However, it is important to conduct follow up trials by using these products in the field to  
344 confirm the findings of this study.

345 **Acknowledgement:** This research was supported by Murdoch University Scholarship and  
346 HIA (Horticulture Innovation Australia) project AV10067. We thank Russel Delroy from  
347 Delroy farms for providing mulch from his orchard, Kay Howard for help with the  
348 preparation of the manuscript, Ziad Mekkawi, Mohemmad Bhaidhani, Ian McKernan and  
349 Bill Dunstan for assistance in the glasshouse, and Rajah Belhaj for lab work, Chris shaw  
350 and Peter Thomson for providing guidance in statistical analysis .We also thank Geoleaks  
351 Solutions, Mineral mulch and Eco Growth for providing commercial soil additives.

352

### 353 **References**

- 354 Aghighi S, Burgess TI, Scott JK, Calver M, Hardy GESJ (2016) Isolation and pathogenicity of  
355 *Phytophthora* species from declining *Rubus anglocandicans*. Plant Pathology  
356 65:451-461. doi:<https://doi.org/10.1111/ppa.12436>  
357 Al-Garni SM, Khan MMA, Bahieldin A (2019) Plant growth-promoting bacteria and silicon  
358 fertilizer enhance plant growth and salinity tolerance in *Coriandrum sativum*.  
359 Journal of Plant Interactions 14 (1):386-396.  
360 doi:<https://doi.org/10.1080/17429145.2019.1641635>  
361 Aryantha IP, Cross R, Guest DI (2000) Suppression of *Phytophthora cinnamomi* in potting  
362 mixes amended with uncomposted and composted animal manures.  
363 Phytopathology 90:775-782. doi:<https://doi.org/10.1094/PHTO.2000.90.7.775>  
364 Bekker TF (2011) Efficacy of water soluble silicon for control of *Phytophthora cinnamomi*  
365 root rot of avocado. Doctoral Dissertation, University of Pretoria,  
366 Bekker TF, Kaiser C, Labuschagne N (2006) Efficacy of water soluble silicon against  
367 *Phytophthora cinnamomi* root rot of avocado: A progress report. South African  
368 Avocado Growers Association Yearbook 29:58-62

- 369 Bekker TF, Labuschagne N, Aveling T, Kaiser C (2007) Efficacy of water soluble potassium  
370 silicate against *Phytophthora* root rot of avocado under field conditions. South  
371 African Avocado Growers Association Yearbook 30:39-48
- 372 Belanger RR, Benhamou N, Menzies JG (2003) Cytological evidence of an active role of  
373 silicon in wheat resistance to powdery mildew (*Blumeria graminis* f. sp. *tritici*).  
374 Phytopathology 93:402-412. doi:<https://doi.org/10.1094/PHTO.2003.93.4.402>
- 375 Berg G (2009) Plant-microbe interactions promoting plant growth and health:  
376 perspectives for controlled use of microorganisms in agriculture. Applied  
377 Microbiology and Biotechnology 84:11-18. doi:[https://doi.org/10.1007/s00253-  
378 009-2092-7](https://doi.org/10.1007/s00253-009-2092-7)
- 379 Bhattacharjee R, Dey U (2014) An overview of fungal and bacterial biopesticides to  
380 control plant pathogens/diseases. African Journal of Microbiology Research  
381 8:1749-1762. doi:<https://doi.org/10.5897/AJMR2013.6356>
- 382 Browne GT, Viveros MA (2005) Effects of phosphonate and mefenoxam treatments on  
383 development of perennial cankers caused by two *Phytophthora* spp. on almond.  
384 Plant disease 89:241-249. doi:<https://doi.org/10.1094/PD-89-0241>
- 385 D'Souza NK, Colquhoun IJ, Shearer BL, Hardy GESJ (2005) Assessing the potential for  
386 biological control of *Phytophthora cinnamomi* by fifteen native Western  
387 Australian jarrah-forest legume species. Australasian Plant Pathology 34:533-540.  
388 doi:<https://doi.org/10.1071/AP05067>
- 389 Dann EK, Le DP (2017) Effects of Silicon Amendment on Soilborne and Fruit Diseases of  
390 Avocado. Plants (Basel) 6:51-65. doi: <https://doi.org/10.3390/plants6040051>
- 391 Devey-Riviere MP, Galiana E (2007) Resistance to pathogens and host developmental  
392 stage: a multifaceted relationship within the plant kingdom. New Phytologist  
393 175:405-416. doi: <https://doi.org/10.1111/j.1469-8137.2007.02130.x>
- 394 Dobrowolski MP, Shearer BL, Colquhoun IJ, O'Brien PA, Hardy GESJ (2008) Selection for  
395 decreased sensitivity to phosphite in *Phytophthora cinnamomi* with prolonged use  
396 of fungicide. Plant pathology 57:928-936. doi:[https://doi.org/10.1111/j.1365-  
397 3059.2008.01883.x](https://doi.org/10.1111/j.1365-3059.2008.01883.x)
- 398 Etesami H (2018) Can interaction between silicon and plant growth promoting  
399 rhizobacteria benefit in alleviating abiotic and biotic stresses in crop plants?  
400 Agriculture, Ecosystems & Environment 253:98-112.  
401 doi:<https://doi.org/10.1016/j.agee.2017.11.007>
- 402 Etesami H, Jeong BR (2018) Silicon (Si): Review and future prospects on the action  
403 mechanisms in alleviating biotic and abiotic stresses in plants. Ecotoxicology and  
404 environmental safety 147:881-896.  
405 doi:<https://doi.org/10.1016/j.ecoenv.2017.09.063>
- 406 Faber BA, Downer AJ, Menge JA Differential effects of mulch on citrus and avocado. In: VII  
407 International Symposium on Orchard and Plantation Systems 2000. pp 303-308
- 408 Gilardi G, Pugliese M, Gullino ML, Garibaldi A (2020) Effect of biocontrol agents and  
409 potassium phosphite against *Phytophthora* crown rot, caused by *Phytophthora*  
410 *capsici*, on zucchini in a closed soilless system. Scientia Horticulturae 265:109207.  
411 doi:<https://doi.org/10.1016/j.scienta.2020.109207>
- 412 Gill HK, Garg H (2014) Pesticides: environmental impacts and management strategies. In:  
413 Pesticides-toxic aspects. IntechOpen, Croatia, pp 187-210

- 414 Hardy GESJ, Barrett S, Shearer B (2001) The future of phosphite as a fungicide to control  
415 the soilborne plant pathogen *Phytophthora cinnamomi* in natural ecosystems.  
416 *Australasian Plant Pathology* 30:133-139. doi:<https://doi.org/10.1071/AP01012>
- 417 King M, Reeve W, Van der Hoek MB, Williams N, McComb J, O'Brien PA, Hardy GESJ  
418 (2010) Defining the phosphite-regulated transcriptome of the plant pathogen  
419 *Phytophthora cinnamomi*. *Molecular Genetics and Genomics* 284:425-435.  
420 doi:<https://doi.org/10.1007/s00438-010-0579-7>
- 421 Konam JK, Guest DI (2002) Leaf litter mulch reduces the survival of *Phytophthora*  
422 *palmivora* under cocoa trees in Papua New Guinea. *Australasian plant pathology*  
423 31:381-383. doi:<https://doi.org/10.1071/AP02043>
- 424 Kremer RJ, Yamada T, de Camargo e Castro PR, Wood BW (2009) Glyphosate interactions  
425 with physiology, nutrition, and diseases of plants: Threat to agricultural  
426 sustainability? *European journal of Agronomy* 31:111-176.  
427 doi:<https://doi.org/10.1016/j.eja.2009.07.004>
- 428 Masikane SL, Novela P, Mohale P, McLeod A (2020) Effect of phosphonate application  
429 timing and-strategy on phosphite fruit and root residues of avocado. *Crop*  
430 *Protection* 128:105008. doi:<https://doi.org/10.1016/j.cropro.2019.105008>
- 431 McDonald AE, Grant BR, Plaxton WC (2001) Phosphite (phosphorous acid): its relevance  
432 in the environment and agriculture and influence on plant phosphate starvation  
433 response. *Journal of plant nutrition* 24:1505-1519.  
434 doi:<https://doi.org/10.1081/PLN-100106017>
- 435 Menzies J, Bowen P, Ehret D, Glass AD (1992) Foliar applications of potassium silicate  
436 reduce severity of powdery mildew on cucumber, muskmelon, and zucchini  
437 squash. *Journal of the American Society for Horticultural Science* 117:902-905.  
438 doi:<https://doi.org/10.21273/JASHS.117.6.902>
- 439 Moraes SRG, Pozza EA, Pozza AAA, de Carvalho JG, de Souza PE (2009) Nutrition in bean  
440 plants and anthracnose intensity in function of silicon and copper application.  
441 *Acta Scientiarum-Agronomy* 31:283-291. doi:<https://doi.org/10.1590/S1807-86212009000200015>
- 442
- 443 Nartvaranant P, Hamill S, Leonardi J, Whiley AW, Subhadrabandhu S (2004) Seasonal  
444 effects of foliar application of phosphonate on phosphonate translocation, in vitro  
445 pollen viability and pollen germination in Hass' avocado (*Persea americana* Mill.).  
446 *The Journal of Horticultural Science and Biotechnology* 79:91-96.  
447 doi:<https://doi.org/10.1080/14620316.2004.11511741>
- 448 Pegg K, Whiley A, Langdon P, Saranah J (1987) Comparison of phosetyl-Al, phosphorous  
449 acid and metalaxyl for the long-term control of *Phytophthora* root rot of avocado.  
450 *Australian Journal of Experimental Agriculture* 27 (3):471-474.  
451 doi:<https://doi.org/10.1071/EA9870471>
- 452 Pegg KG (2010) Pathology challenges in avocado: *Phytophthora* management. Paper  
453 presented at the Southern Produce Avocado Conference, New Zealand, June 2010
- 454 Pegg KG, Whiley AW (1987) *Phytophthora* control in Australia. *South African Avocado*  
455 *Growers Association Yearbook* 10:94-96
- 456 Poorter H, Fiorani F, Pieruschka R, Wojciechowski T, van der Putten WH, Kleyer M, Schurr  
457 U, Postma J (2016) Pampered inside, pestered outside? Differences and  
458 similarities between plants growing in controlled conditions and in the field. *New*  
459 *Phytologist* 212 (4):838-855. doi:<https://doi.org/10.1111/nph.14243>

- 460 Pozza EA, Pozza AAA, Botelho DMDS (2015) Silicon in plant disease control. *Revista Ceres*  
461 62:323-331. doi:<https://doi.org/10.1590/0034-737X201562030013>
- 462 Raaijmakers JM, Paulitz TC, Steinberg C, Alabouvette C, Moëgne-Loccoz Y (2009) The  
463 rhizosphere: a playground and battlefield for soilborne pathogens and beneficial  
464 microorganisms. *Plant and soil* 321 (1-2):341-361.  
465 doi:<https://doi.org/10.1007/s11104-008-9568-6>
- 466 Rajput VD, Minkina T, Feizi M, Kumari A, Khan M, Mandzhieva S, Sushkova S, El-Ramady  
467 H, Verma KK, Singh A (2021) Effects of silicon and silicon-based nanoparticles on  
468 rhizosphere microbiome, plant stress and growth. *Biology* 10 (8):791.  
469 doi:<https://doi.org/10.3390/biology10080791>
- 470 Ramírez-Gil JG, Castañeda-Sánchez DA, Morales-Osorio JG (2017) Production of avocado  
471 trees infected with *Phytophthora cinnamomi* under different management  
472 regimes. *Plant Pathology* 66 (4):623-632. doi: <https://doi.org/10.1111/ppa.12620>
- 473 Ramirez-Gil JG, Castaneda-Sanchez DA, Morales-Osorio JG (2017) Production of avocado  
474 trees infected with *Phytophthora cinnamomi* under different management  
475 regimes. *Plant pathology* 66:623-632. doi: <https://doi.org/10.1111/ppa.12620>
- 476 Reeksting BJ, Olivier NA, van den Berg N (2016) Transcriptome responses of an ungrafted  
477 *Phytophthora* root rot tolerant avocado (*Persea americana*) rootstock to flooding  
478 and *Phytophthora cinnamomi*. *BMC Plant Biology* 16:205.  
479 doi:<https://doi.org/10.1186/s12870-016-0893-2>
- 480 Rodriguez-Molina MC, Torres-Vila LM, Blanco-Santos A, Nunez EP, Torres-Álvarez E (2002)  
481 Viability of holm and cork oak seedlings from acorns sown in soils naturally  
482 infected with *Phytophthora cinnamomi*. *Forest Pathology* 32:365-372
- 483 Samuels A, Glass A, Ehret D, Menzies J (1991) Mobility and deposition of silicon in  
484 cucumber plants. *Plant, Cell & Environment* 14 (5):485-492.  
485 doi:<https://doi.org/10.1111/j.1365-3040.1991.tb01518.x>
- 486 Schadler M, Brandl R, Kempel A (2010) “Afterlife” effects of mycorrhization on the  
487 decomposition of plant residues. *Soil Biology and Biochemistry* 42:521-523.  
488 doi:<https://doi.org/10.1016/j.soilbio.2009.11.031>
- 489 Scott P, Barber P, Hardy GSJ (2015) Novel phosphite and nutrient application to control  
490 *Phytophthora cinnamomi* disease. *Australasian Plant Pathology* 44 (4):431-436.  
491 doi:<https://doi.org/10.1007/s13313-015-0365-4>
- 492 Shearer B, Fairman R (2007) A stem injection of phosphite protects Banksia species and  
493 Eucalyptus marginata from *Phytophthora cinnamomi* for at least four years.  
494 *Australasian Plant Pathology* 36 (1):78-86. doi:<https://doi.org/10.1071/AP06085>
- 495 Simamora AV, Paap T, Howard K, Stukely MJC, Hardy GESJ, Burgess TI (2018)  
496 *Phytophthora* contamination in a nursery and its potential dispersal into the  
497 natural environment. *Plant disease* 102:132-139.  
498 doi:<https://doi.org/10.1094/PDIS-05-17-0689-RE>
- 499 Song D, Ibrahim S, Hayek S (2012) Recent application of probiotics in food and agricultural  
500 science. *Probiotics* 10:1-34
- 501 Tubana BS, Babu T, Datnoff LE (2016) A review of silicon in soils and plants and its role in  
502 US agriculture: history and future perspectives. *Soil Science* 181:393-411.  
503 doi:<http://doi.org/10.1097/SS.0000000000000179>
- 504 Wolstenholme BN, Sheard A (2010) Integrated management of *Phytophthora* root rot the  
505 “Pegg Wheel” updated. *South African Avocado Growers Association Avoinfo*  
506 *Newsletter* 175:11-15

- 507 Xi Y, Han X, Zhang Z, Joshi J, Borza T, Aqa MM, Zhang B, Yuan H, Wang-Pruski G (2020)  
508 Exogenous phosphite application alleviates the adverse effects of heat stress and  
509 improves thermotolerance of potato (*Solanum tuberosum* L.) seedlings.  
510 Ecotoxicology and environmental safety 190:110048.  
511 doi:<https://doi.org/10.1016/j.ecoenv.2019.110048>
- 512 Zobiolo LHS, de Oliveira RS, Huber DM, Constantin J, de Castro C, de Oliveira FA, de  
513 Oliveira A (2010) Glyphosate reduces shoot concentrations of mineral nutrients in  
514 glyphosate-resistant soybeans. Plant and Soil 328 (1-2):57-69
- 515 Zobiolo LHS, Kremer RJ, Oliveira Jr RS, Constantin J (2011) Glyphosate affects  
516 micro-organisms in rhizospheres of glyphosate-resistant soybeans. Journal of  
517 applied microbiology 110:118-127. doi: [https://doi.org/10.1111/j.1365-  
518 2672.2010.04864.x](https://doi.org/10.1111/j.1365-2672.2010.04864.x)  
519

520 **Figure captions**

521 **Fig1** Examples of root damage of avocado roots after inoculation with *Phytophthora*  
522 *cinnamomi*. Whole root systems were rated visually for *Phytophthora* root rot on the bases  
523 of scale 1-5 (left to right) 1 = healthy roots, 2 = 1-25% damage, 3 = 26-50% damage, 4 =  
524 51-75% damage 5 = 76-100% damage.

525 **Fig. 2 a)** The effect of eleven soil treatments (T1-T11, see Table 1) on shoot dry weight of  
526 non-infested avocado plants (grey bars) and those infested with *Phytophthora cinnamomi*  
527 (black bars). b) The effect of soil treatments (T1, T3, T4, T7, T8, T10, see Table 1) on  
528 shoot dry weight of non-infested avocado plants (grey bars) and those infested with  
529 *Phytophthora cinnamomi* (black bars). Vertical lines indicate SE and letters indicate  
530 significant difference ( $p < 0.05$ ).

531 **Fig. 3 a)** The effect of eleven soil treatments (T1-T11, see Table 1) on total root dry weight  
532 of non-infested avocado plants (grey bars) and those infested with *Phytophthora*  
533 *cinnamomi* (black bars). b) The effect of soil treatments (T1, T3, T4, T7, T8, T10, see  
534 Table 1) on total root dry weight of non-infested avocado plants (grey bars) and those  
535 infested with *Phytophthora cinnamomi* (black bars). Vertical lines indicate SE and letters  
536 indicate significant difference ( $p < 0.05$ ).

537 **Fig. 4a)** The effect of eleven soil treatments (T1-T11, see Table 1) on fine root dry weight  
538 of non-infested avocado plants (grey bars) and those infested with *Phytophthora*  
539 *cinnamomi* (black bars). b) The effect of soil treatments (T1, T3, T4, T7, T8, T10, see  
540 Table 1) on fine root dry weight of non-infested avocado plants (grey bars) and those  
541 infested with *Phytophthora cinnamomi* (black bars). Vertical lines indicate SE and letters  
542 indicate significant difference ( $p < 0.05$ ).

543 **Fig. 5a)** The effect of eleven soil treatments (T1-T11, see Table 1) on root damage of non-  
544 infested avocado plants (grey bars) and those infested with *Phytophthora cinnamomi*  
545 (black bars). b) The effect of soil treatments (T1, T3, T4, T7, T8, T10, see Table 1) on root  
546 damage of non-infested avocado plants (grey bars) and those infested with *Phytophthora*  
547 *cinnamomi* (black bars). Vertical lines indicate SE and letters indicate significant  
548 difference ( $\alpha < 0.05$ ).

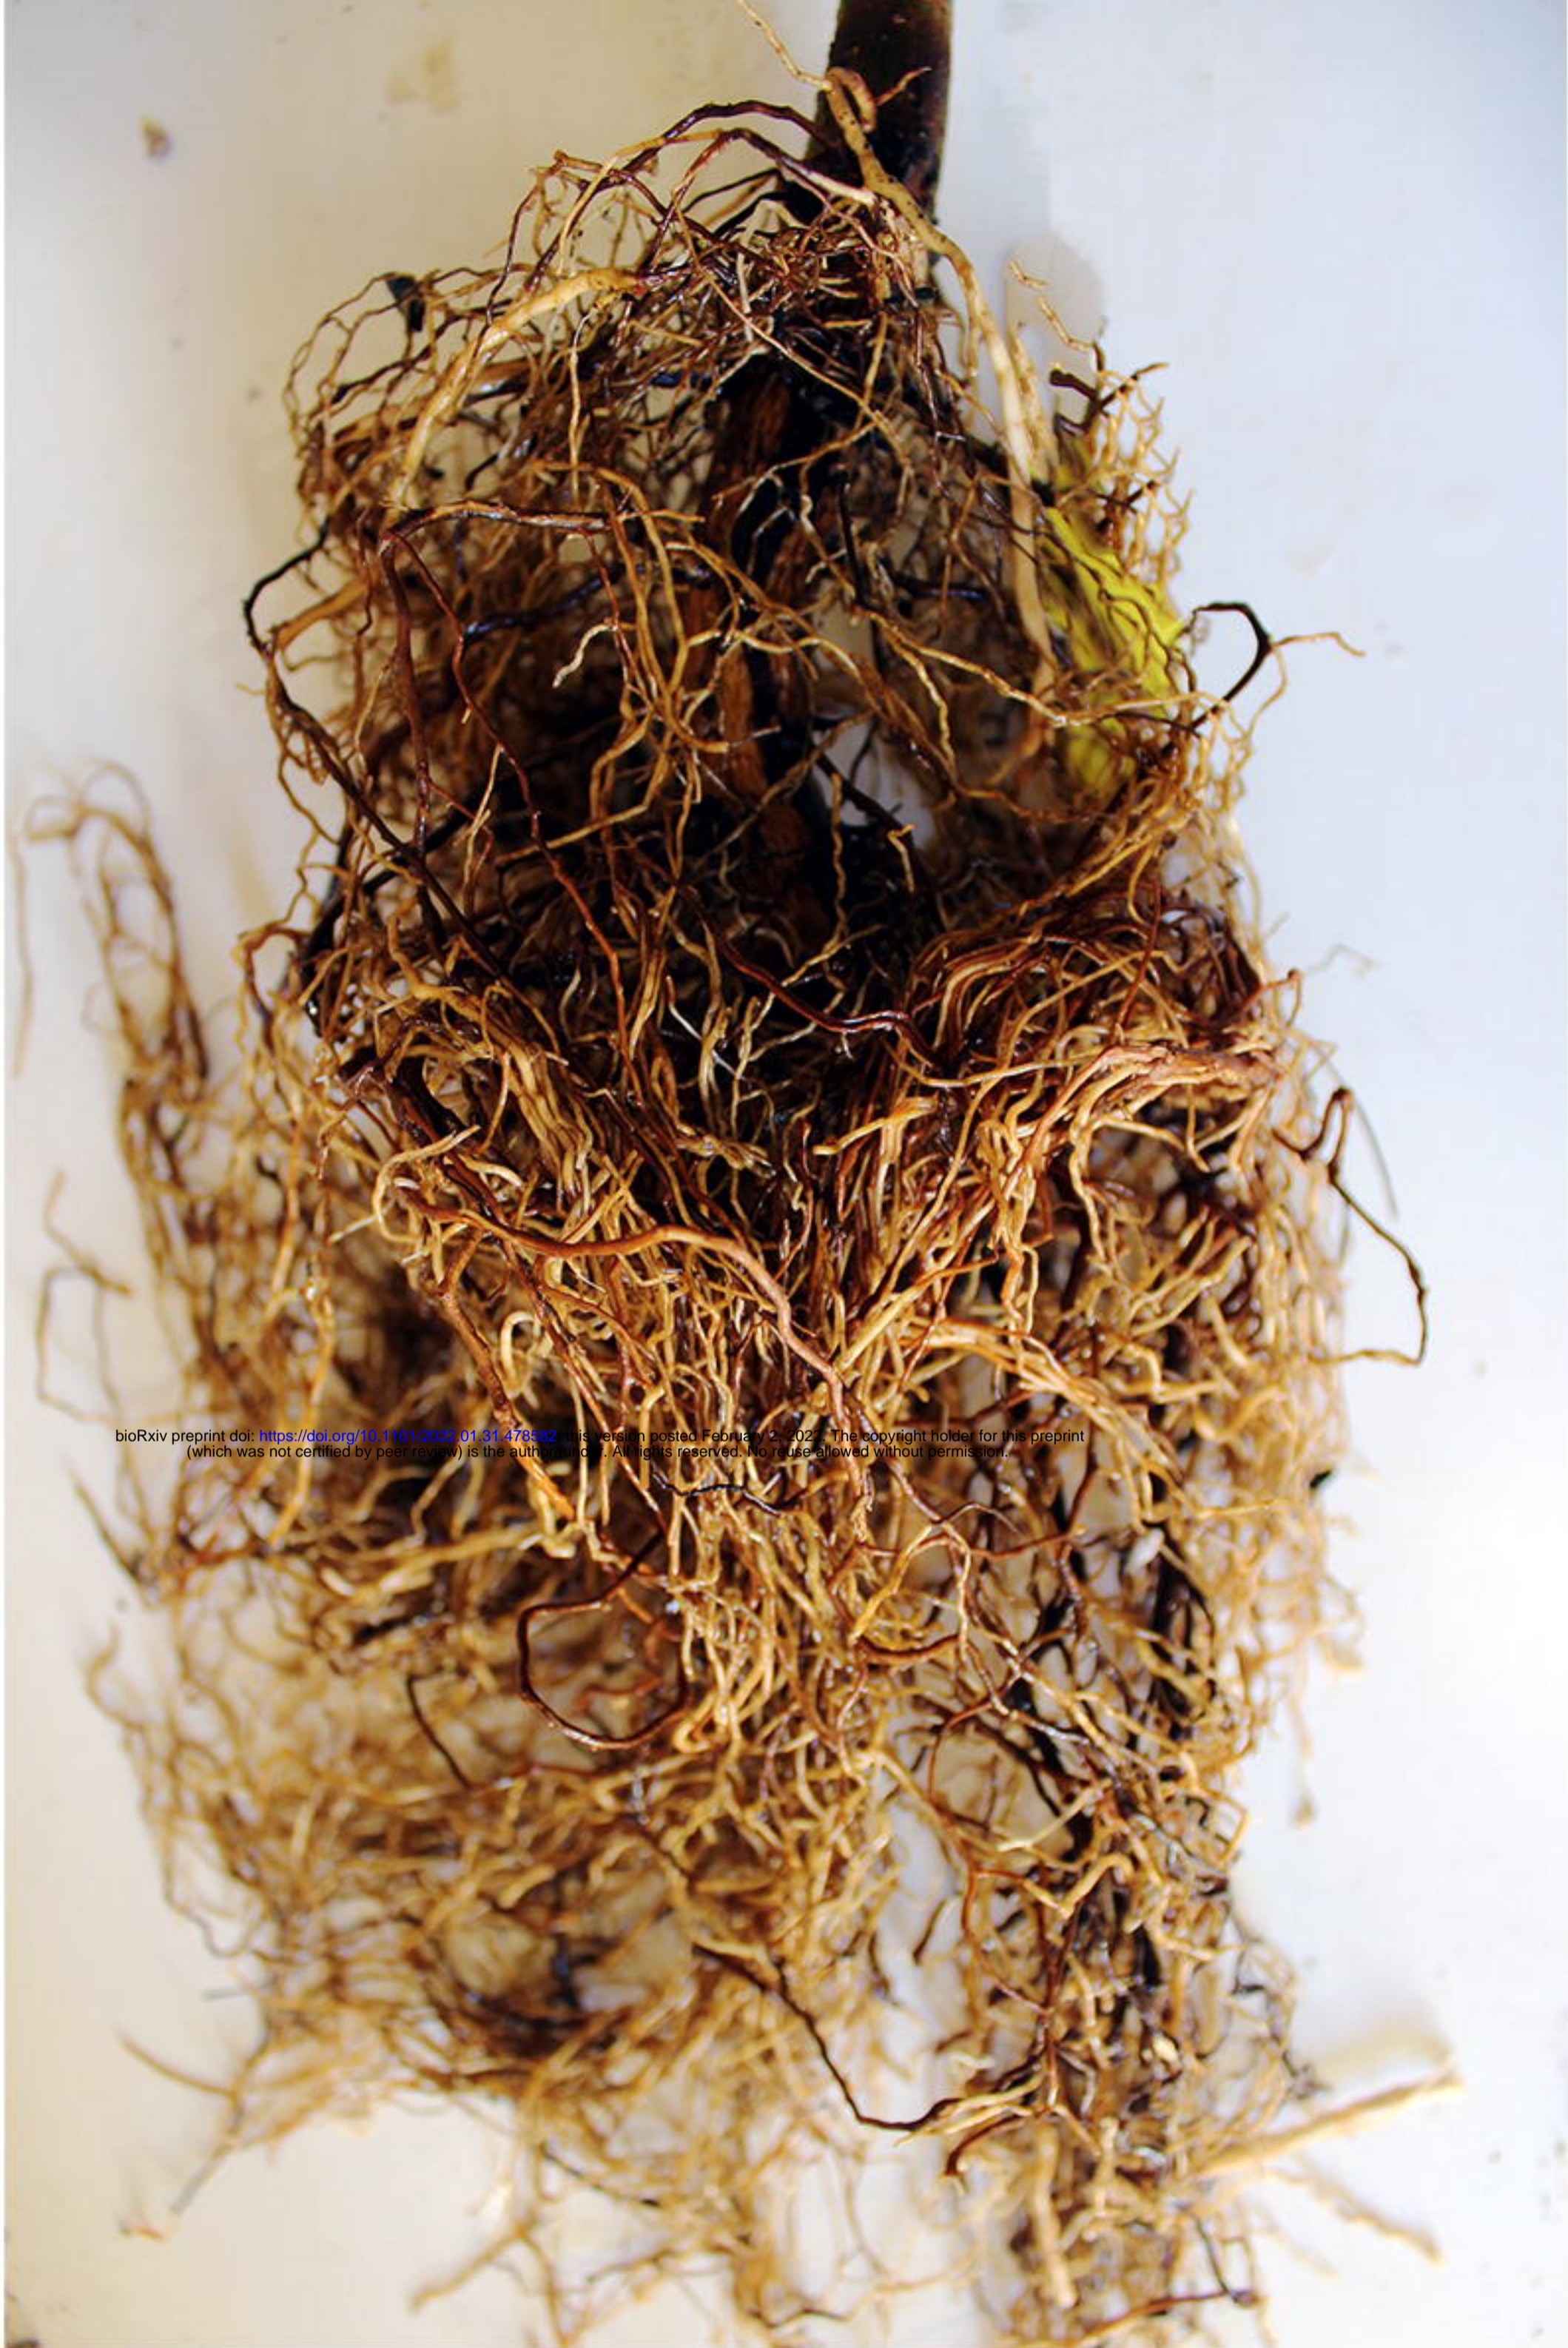

**1**

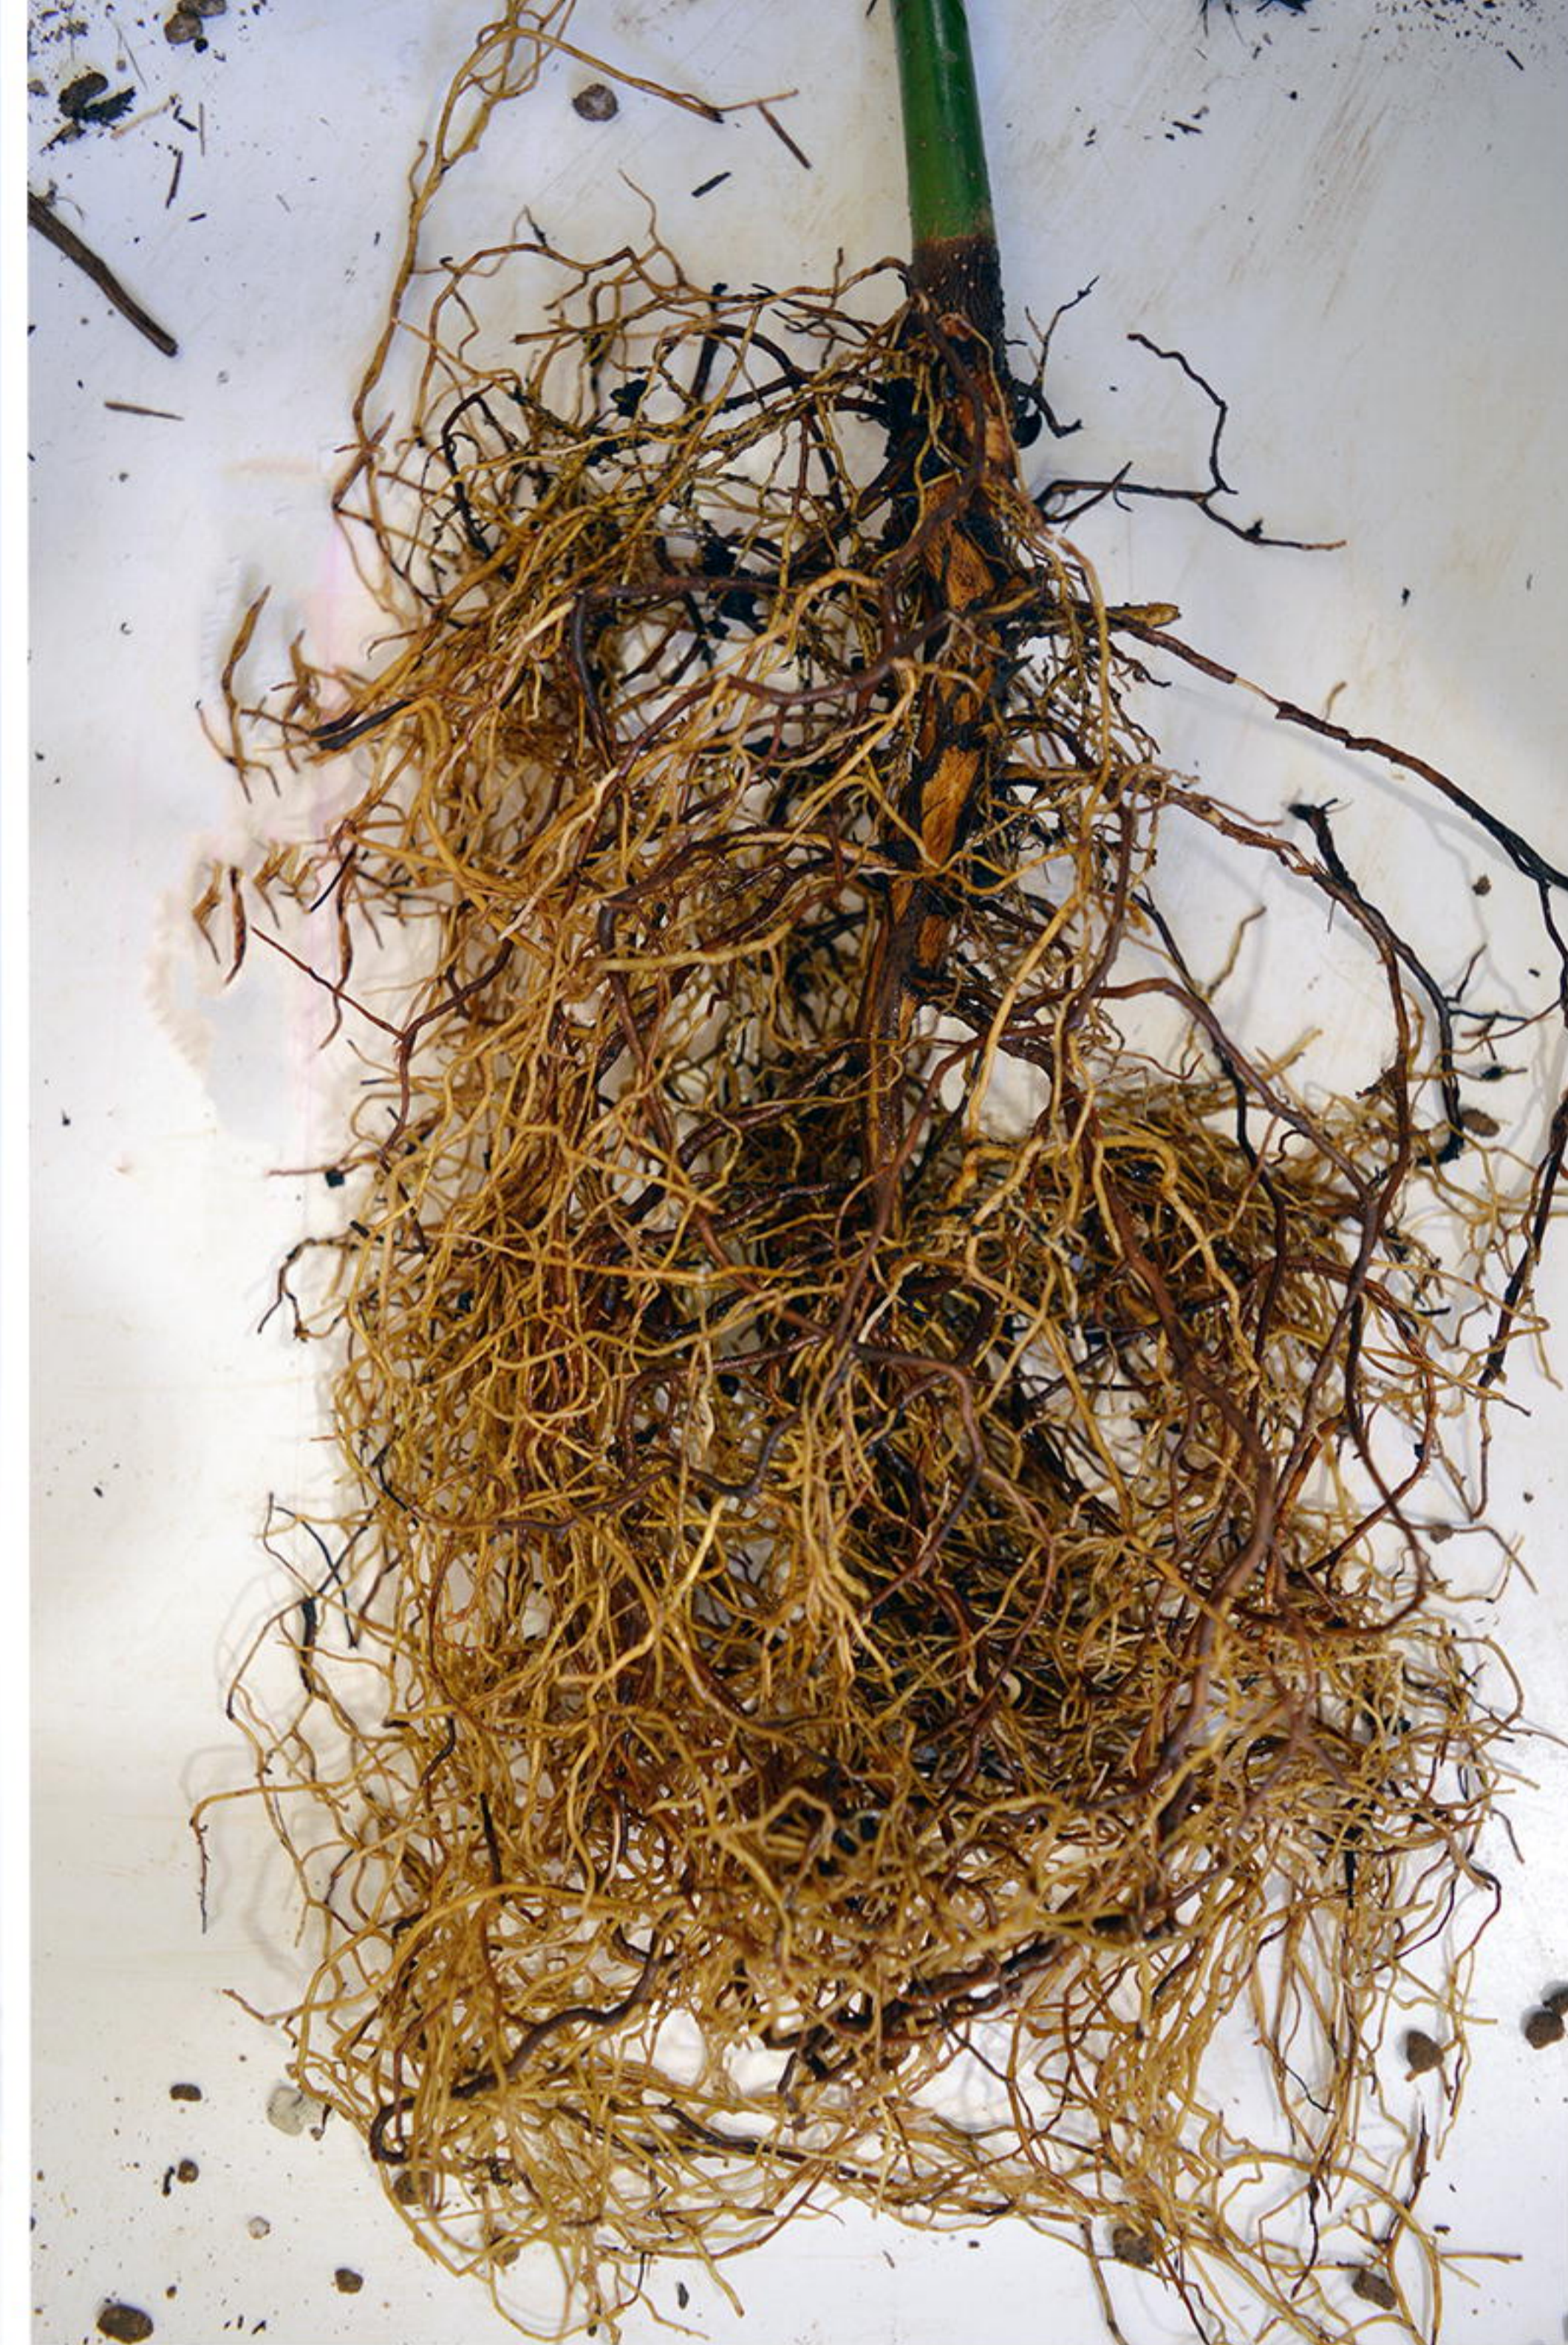

**2**

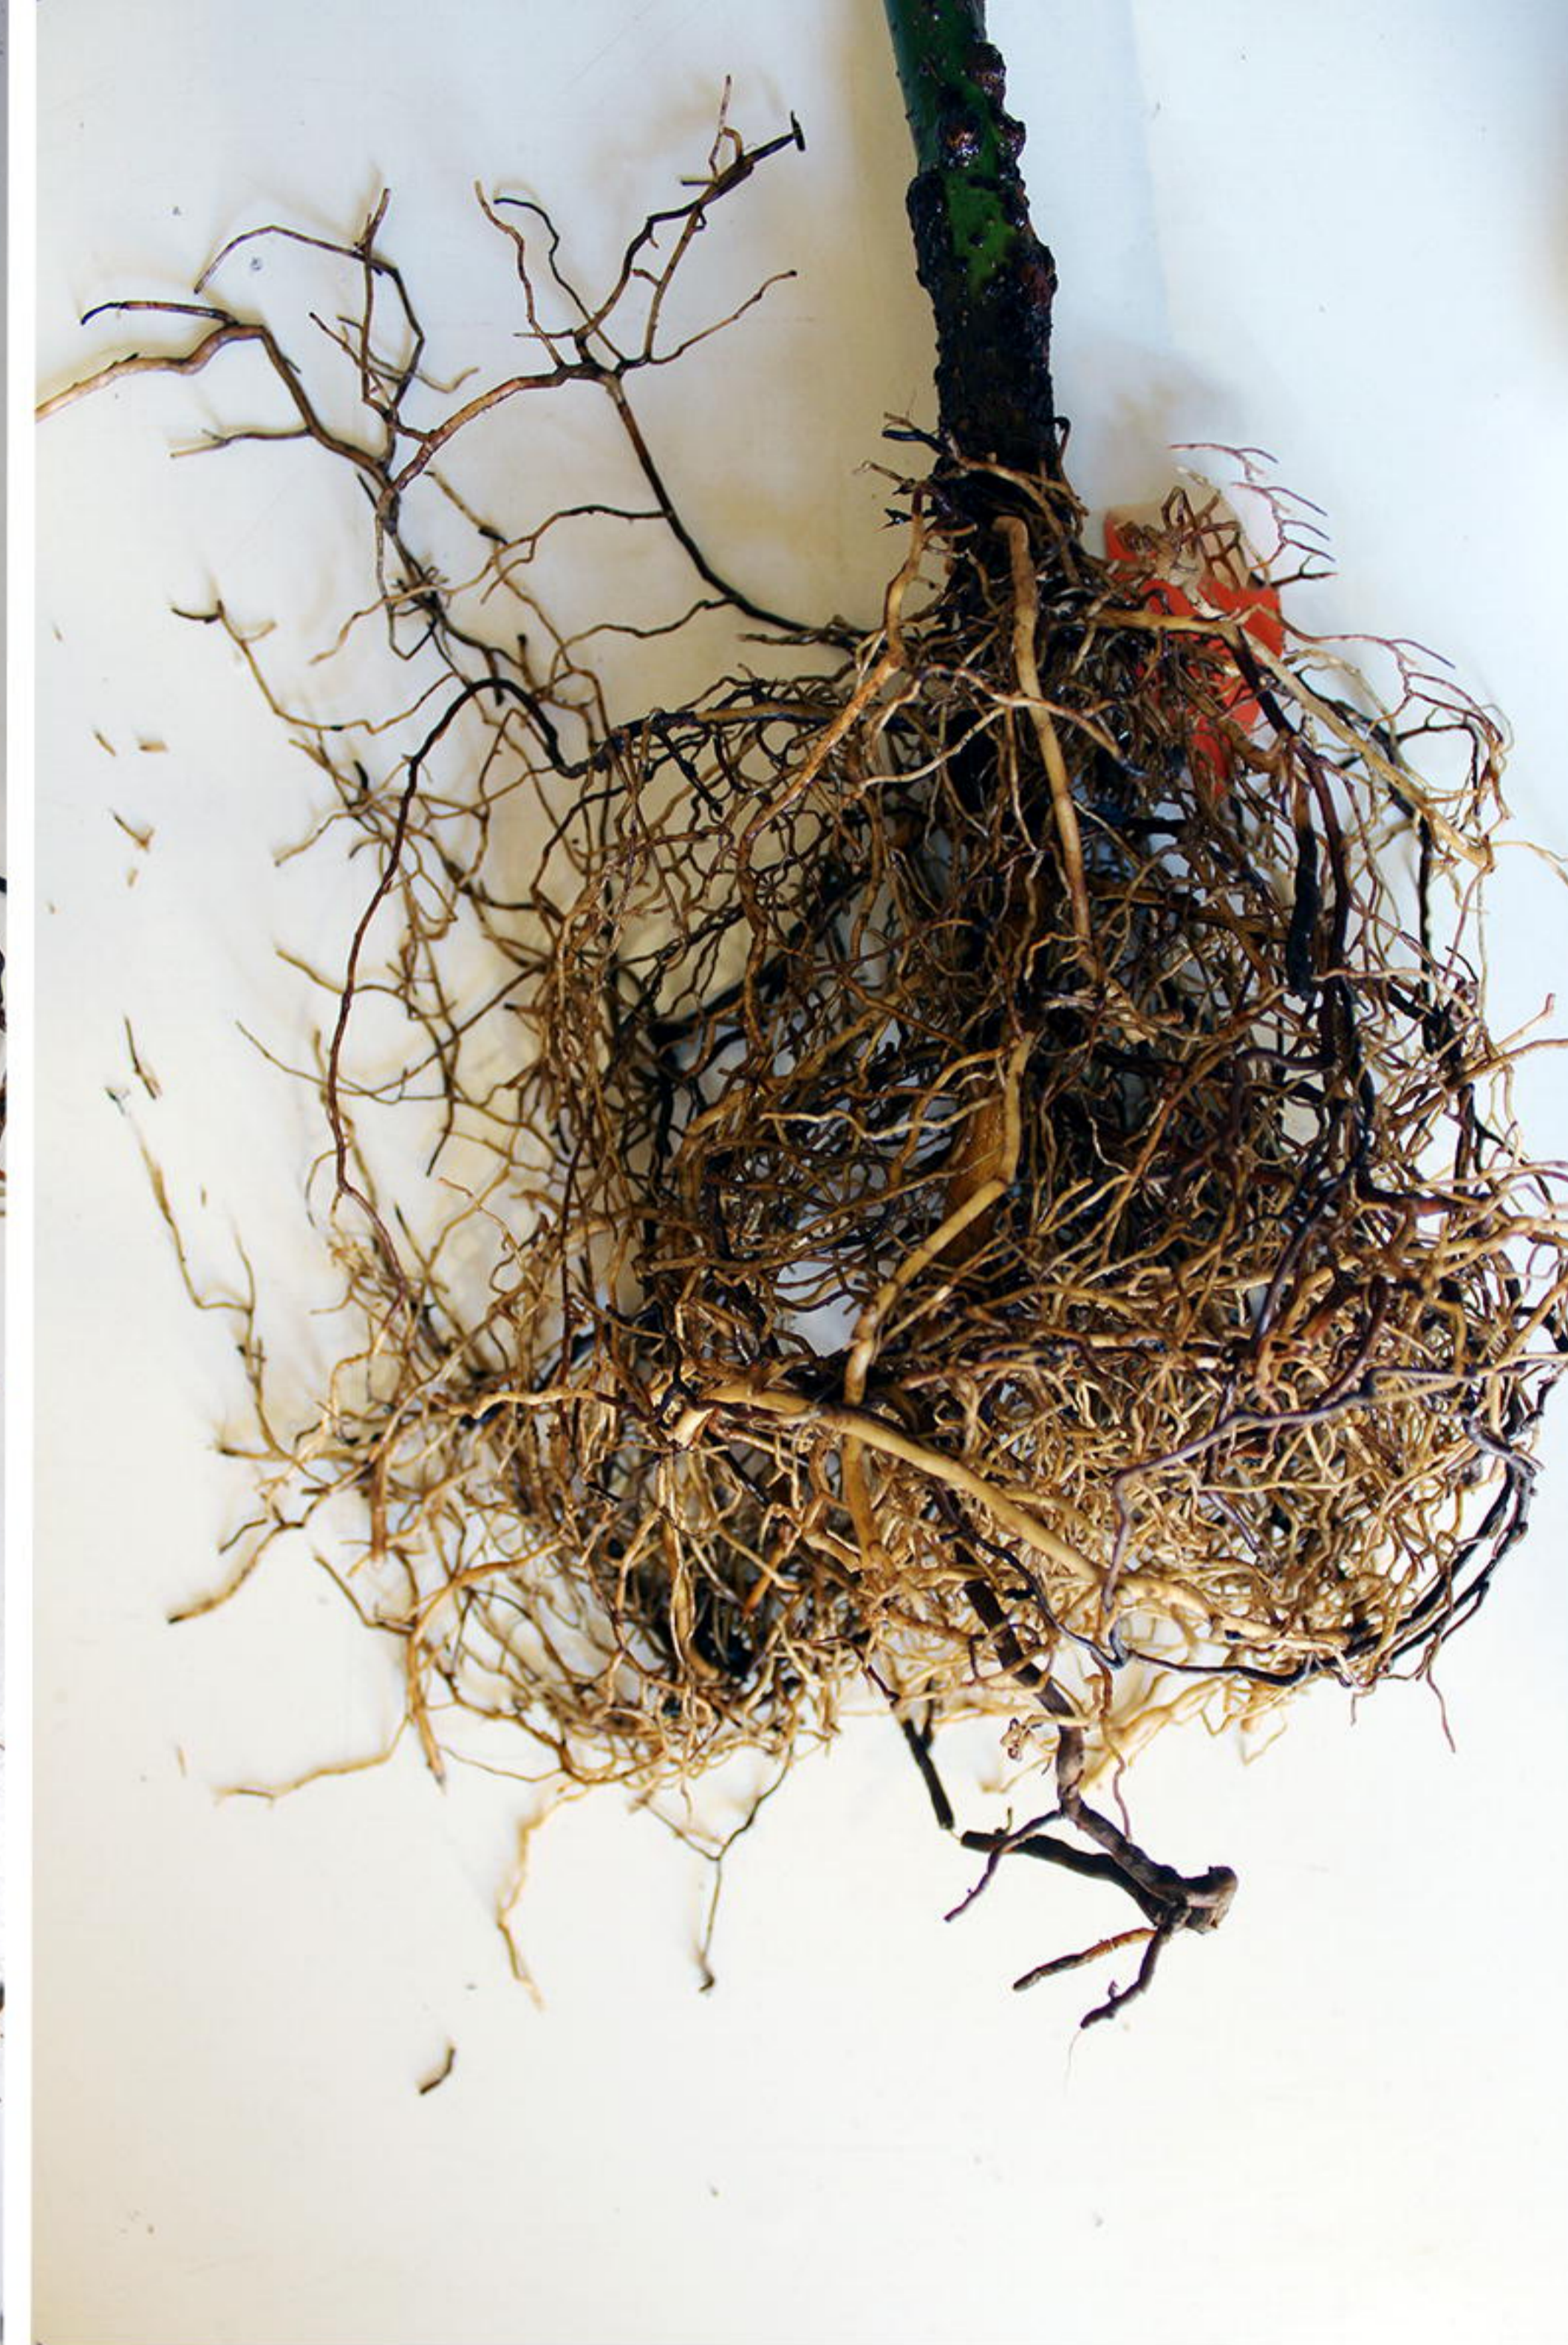

**3**

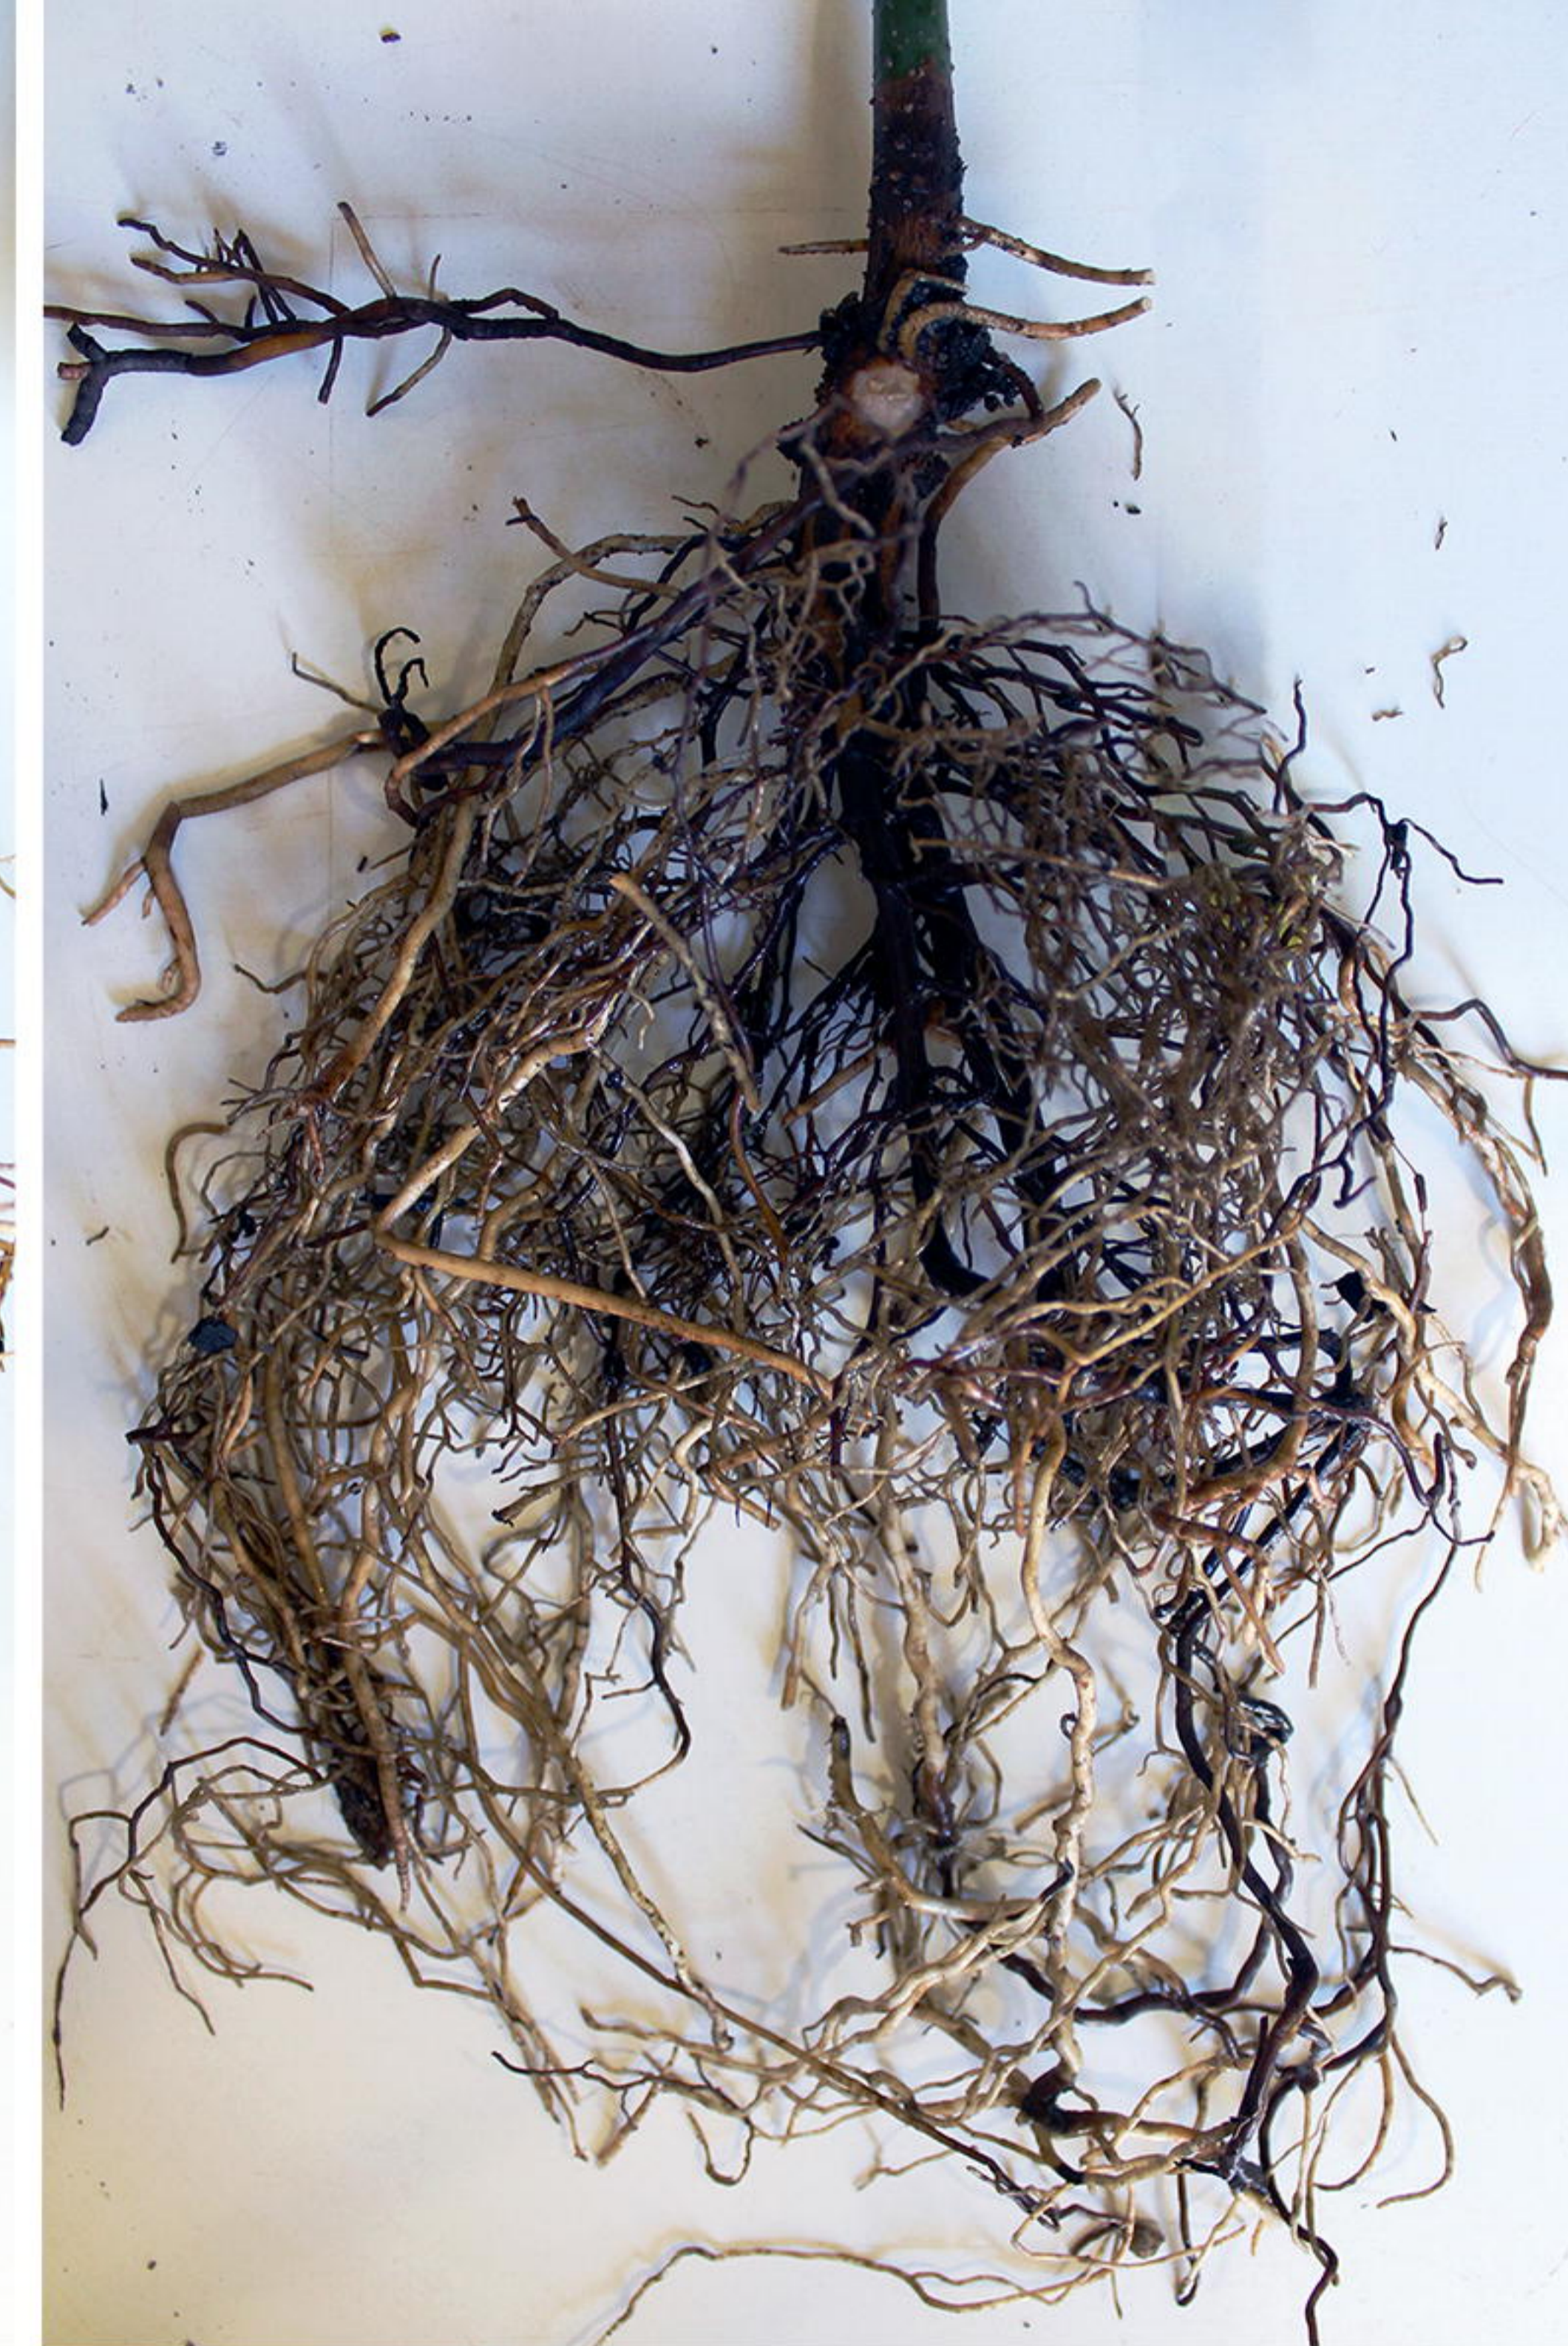

**4**

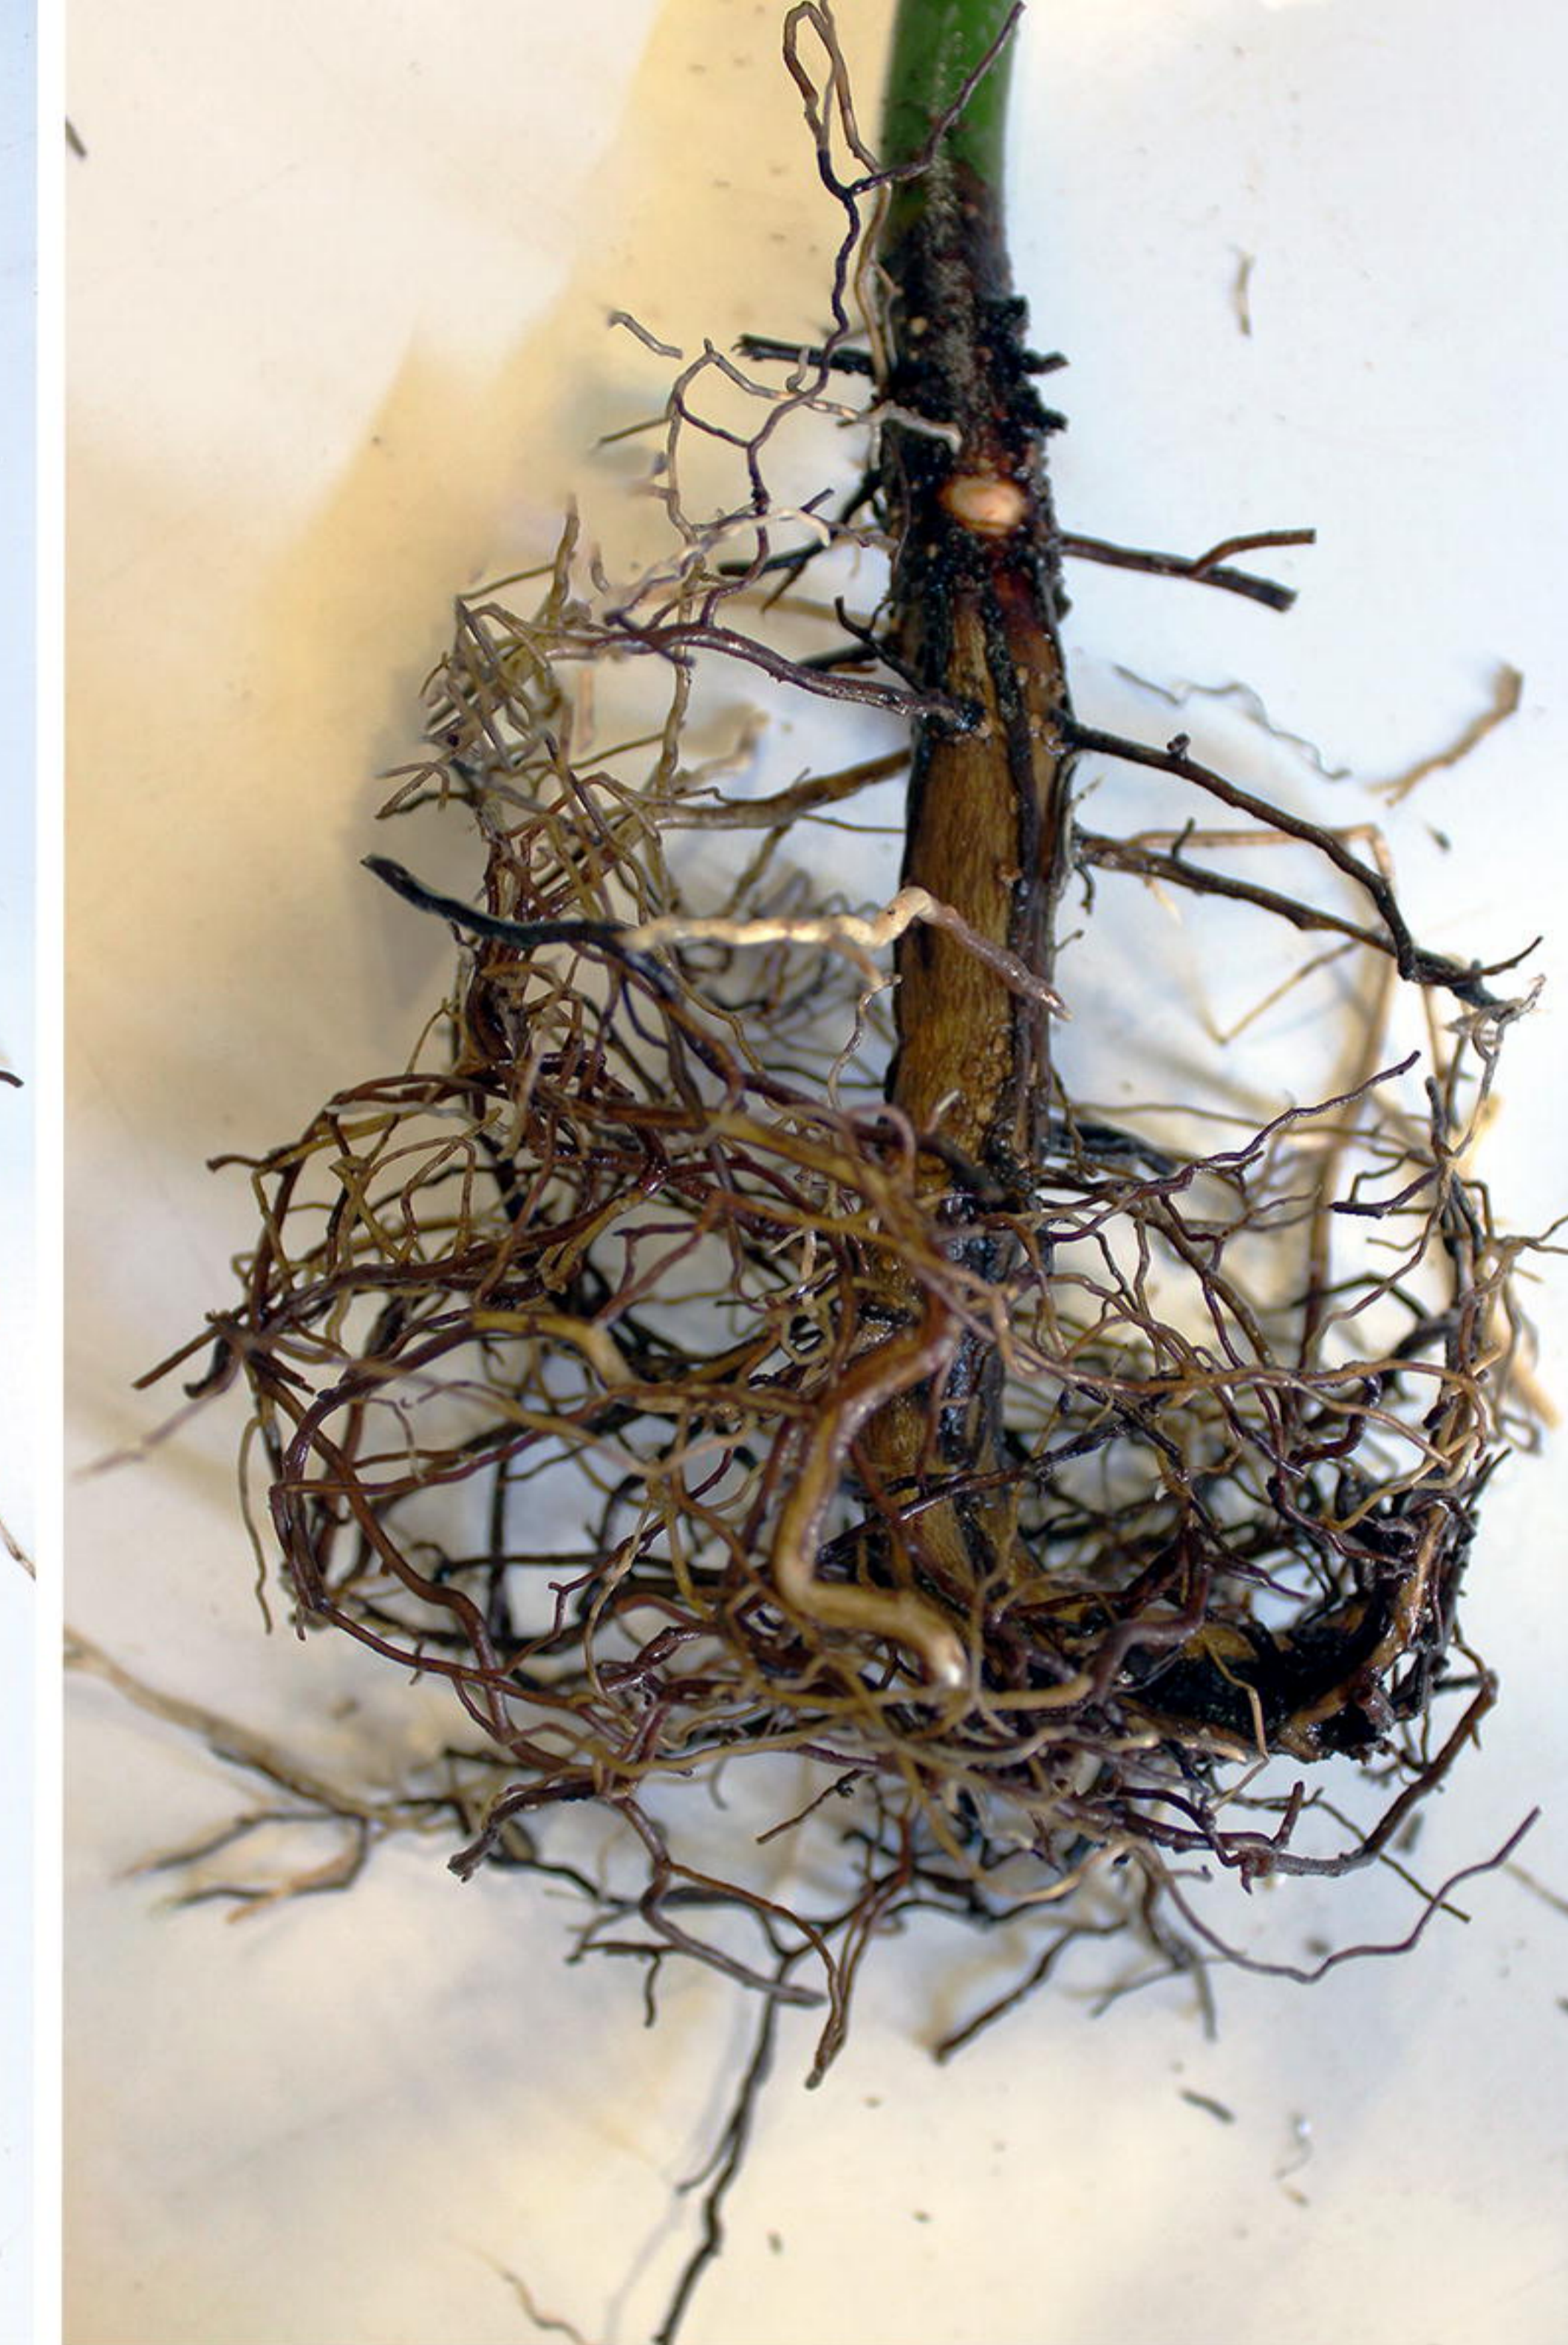

**5**

**Root Damage Score**



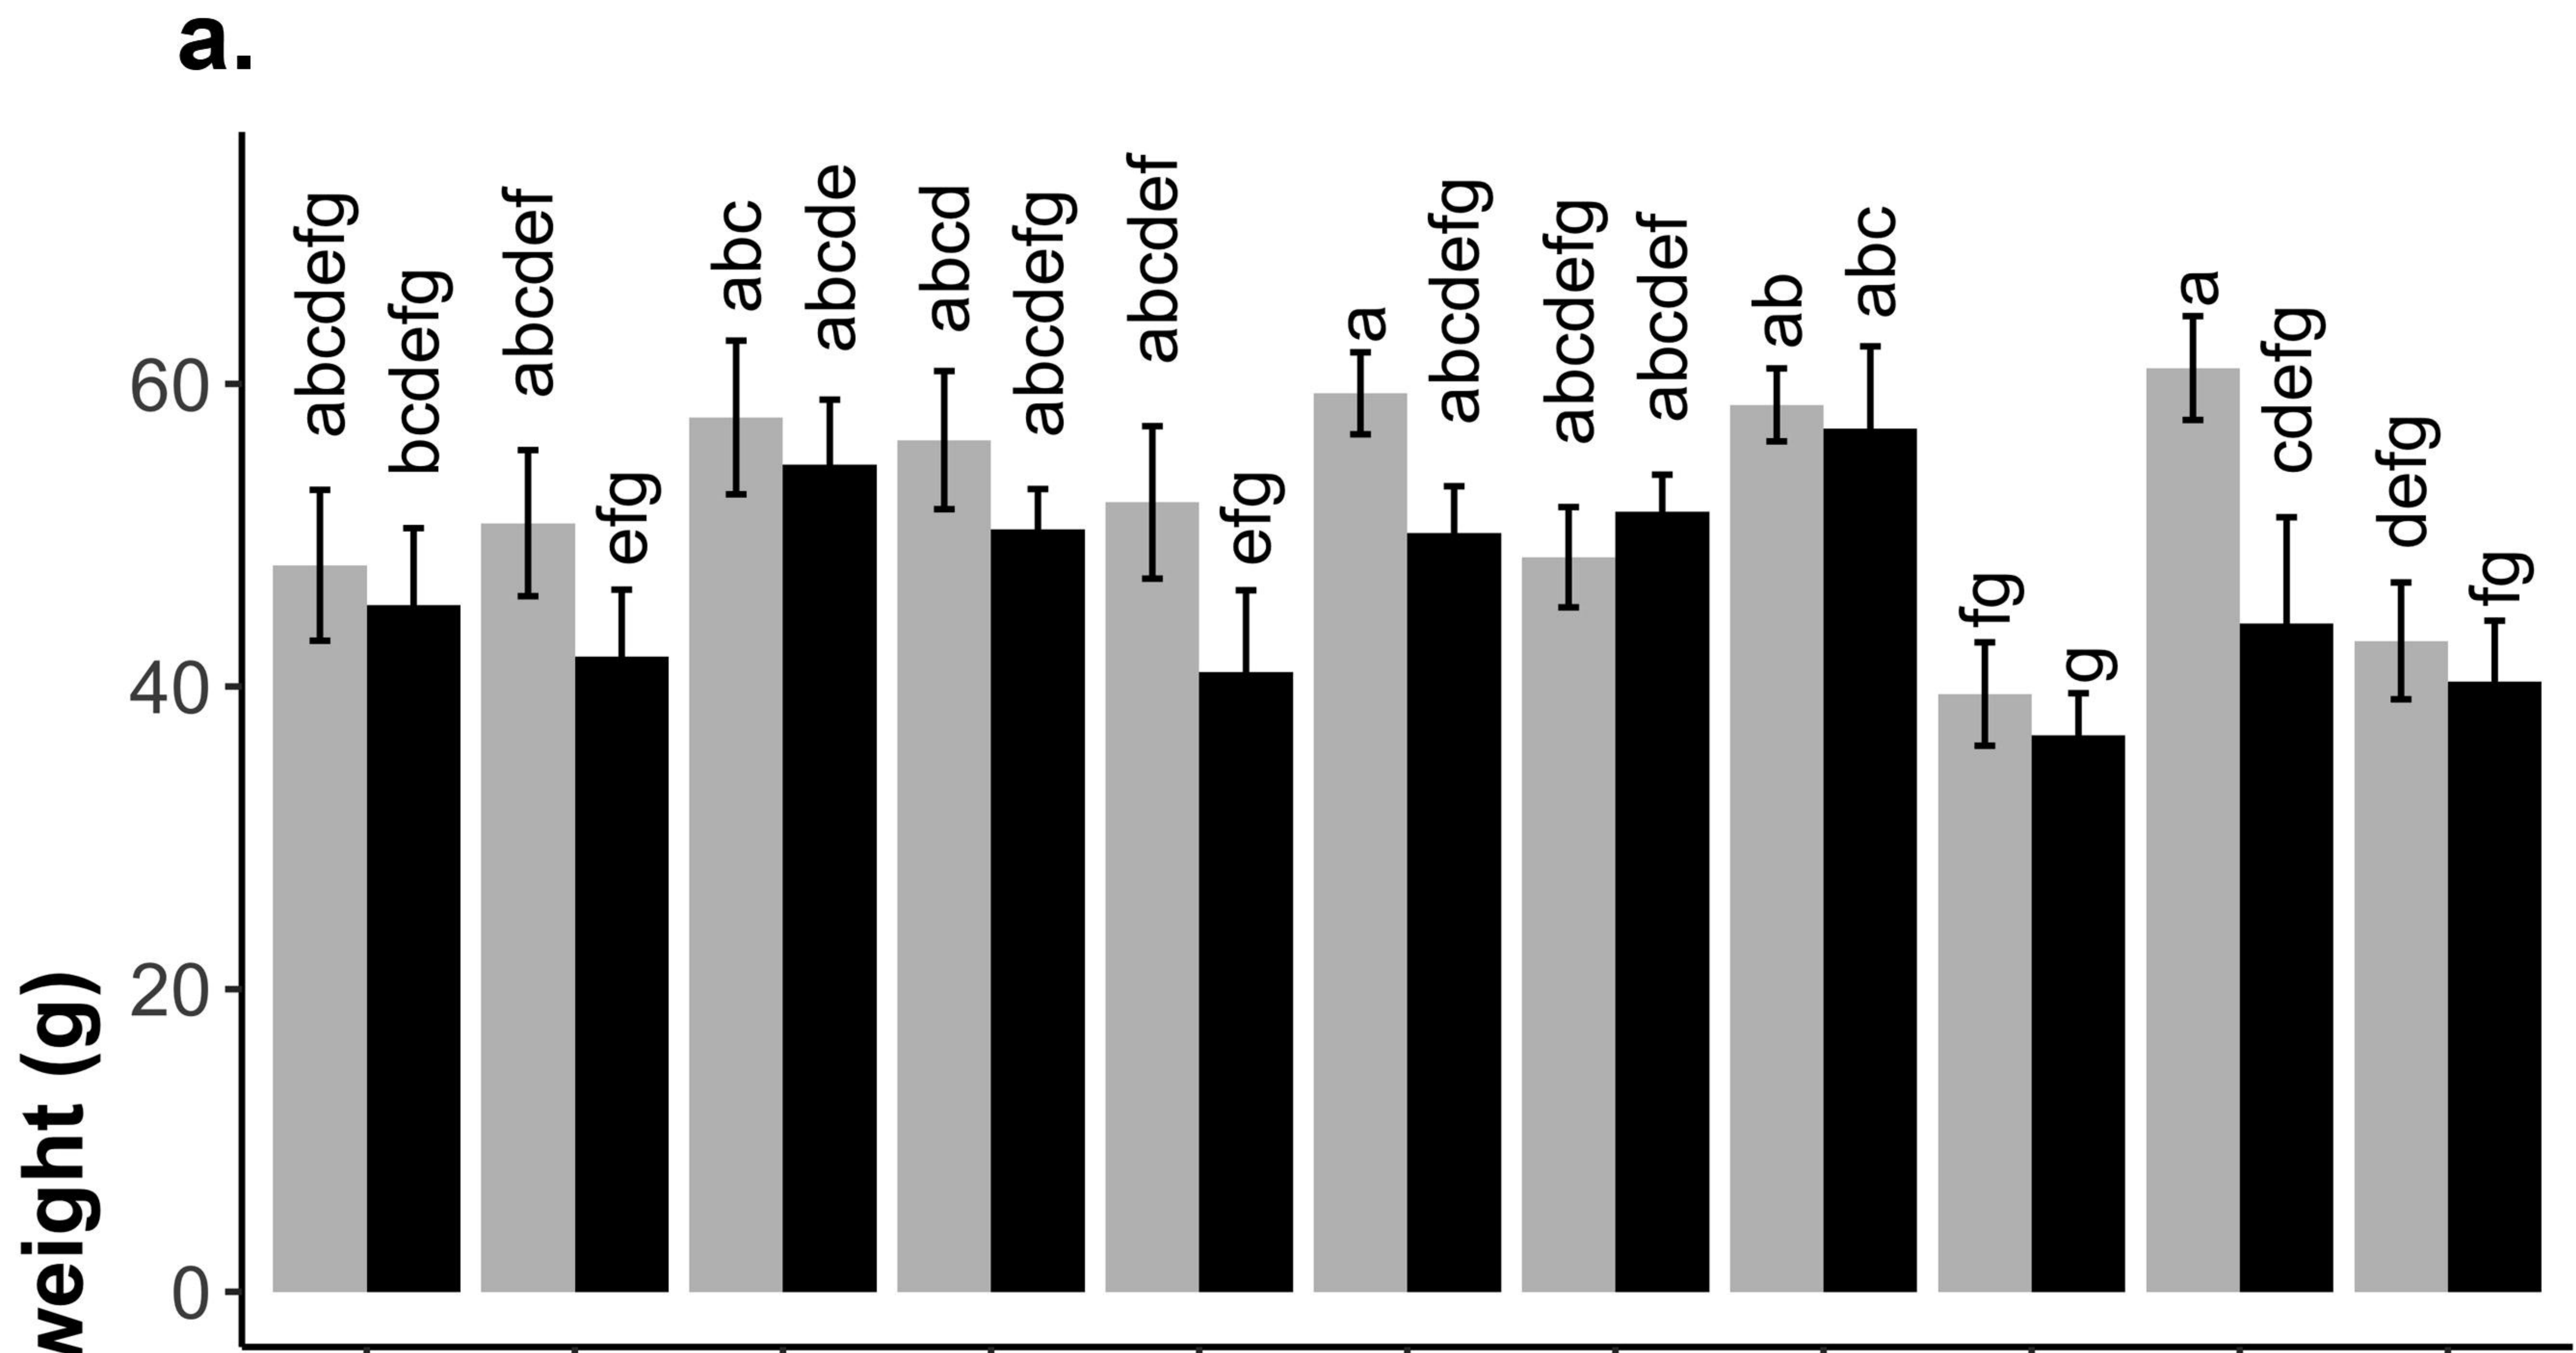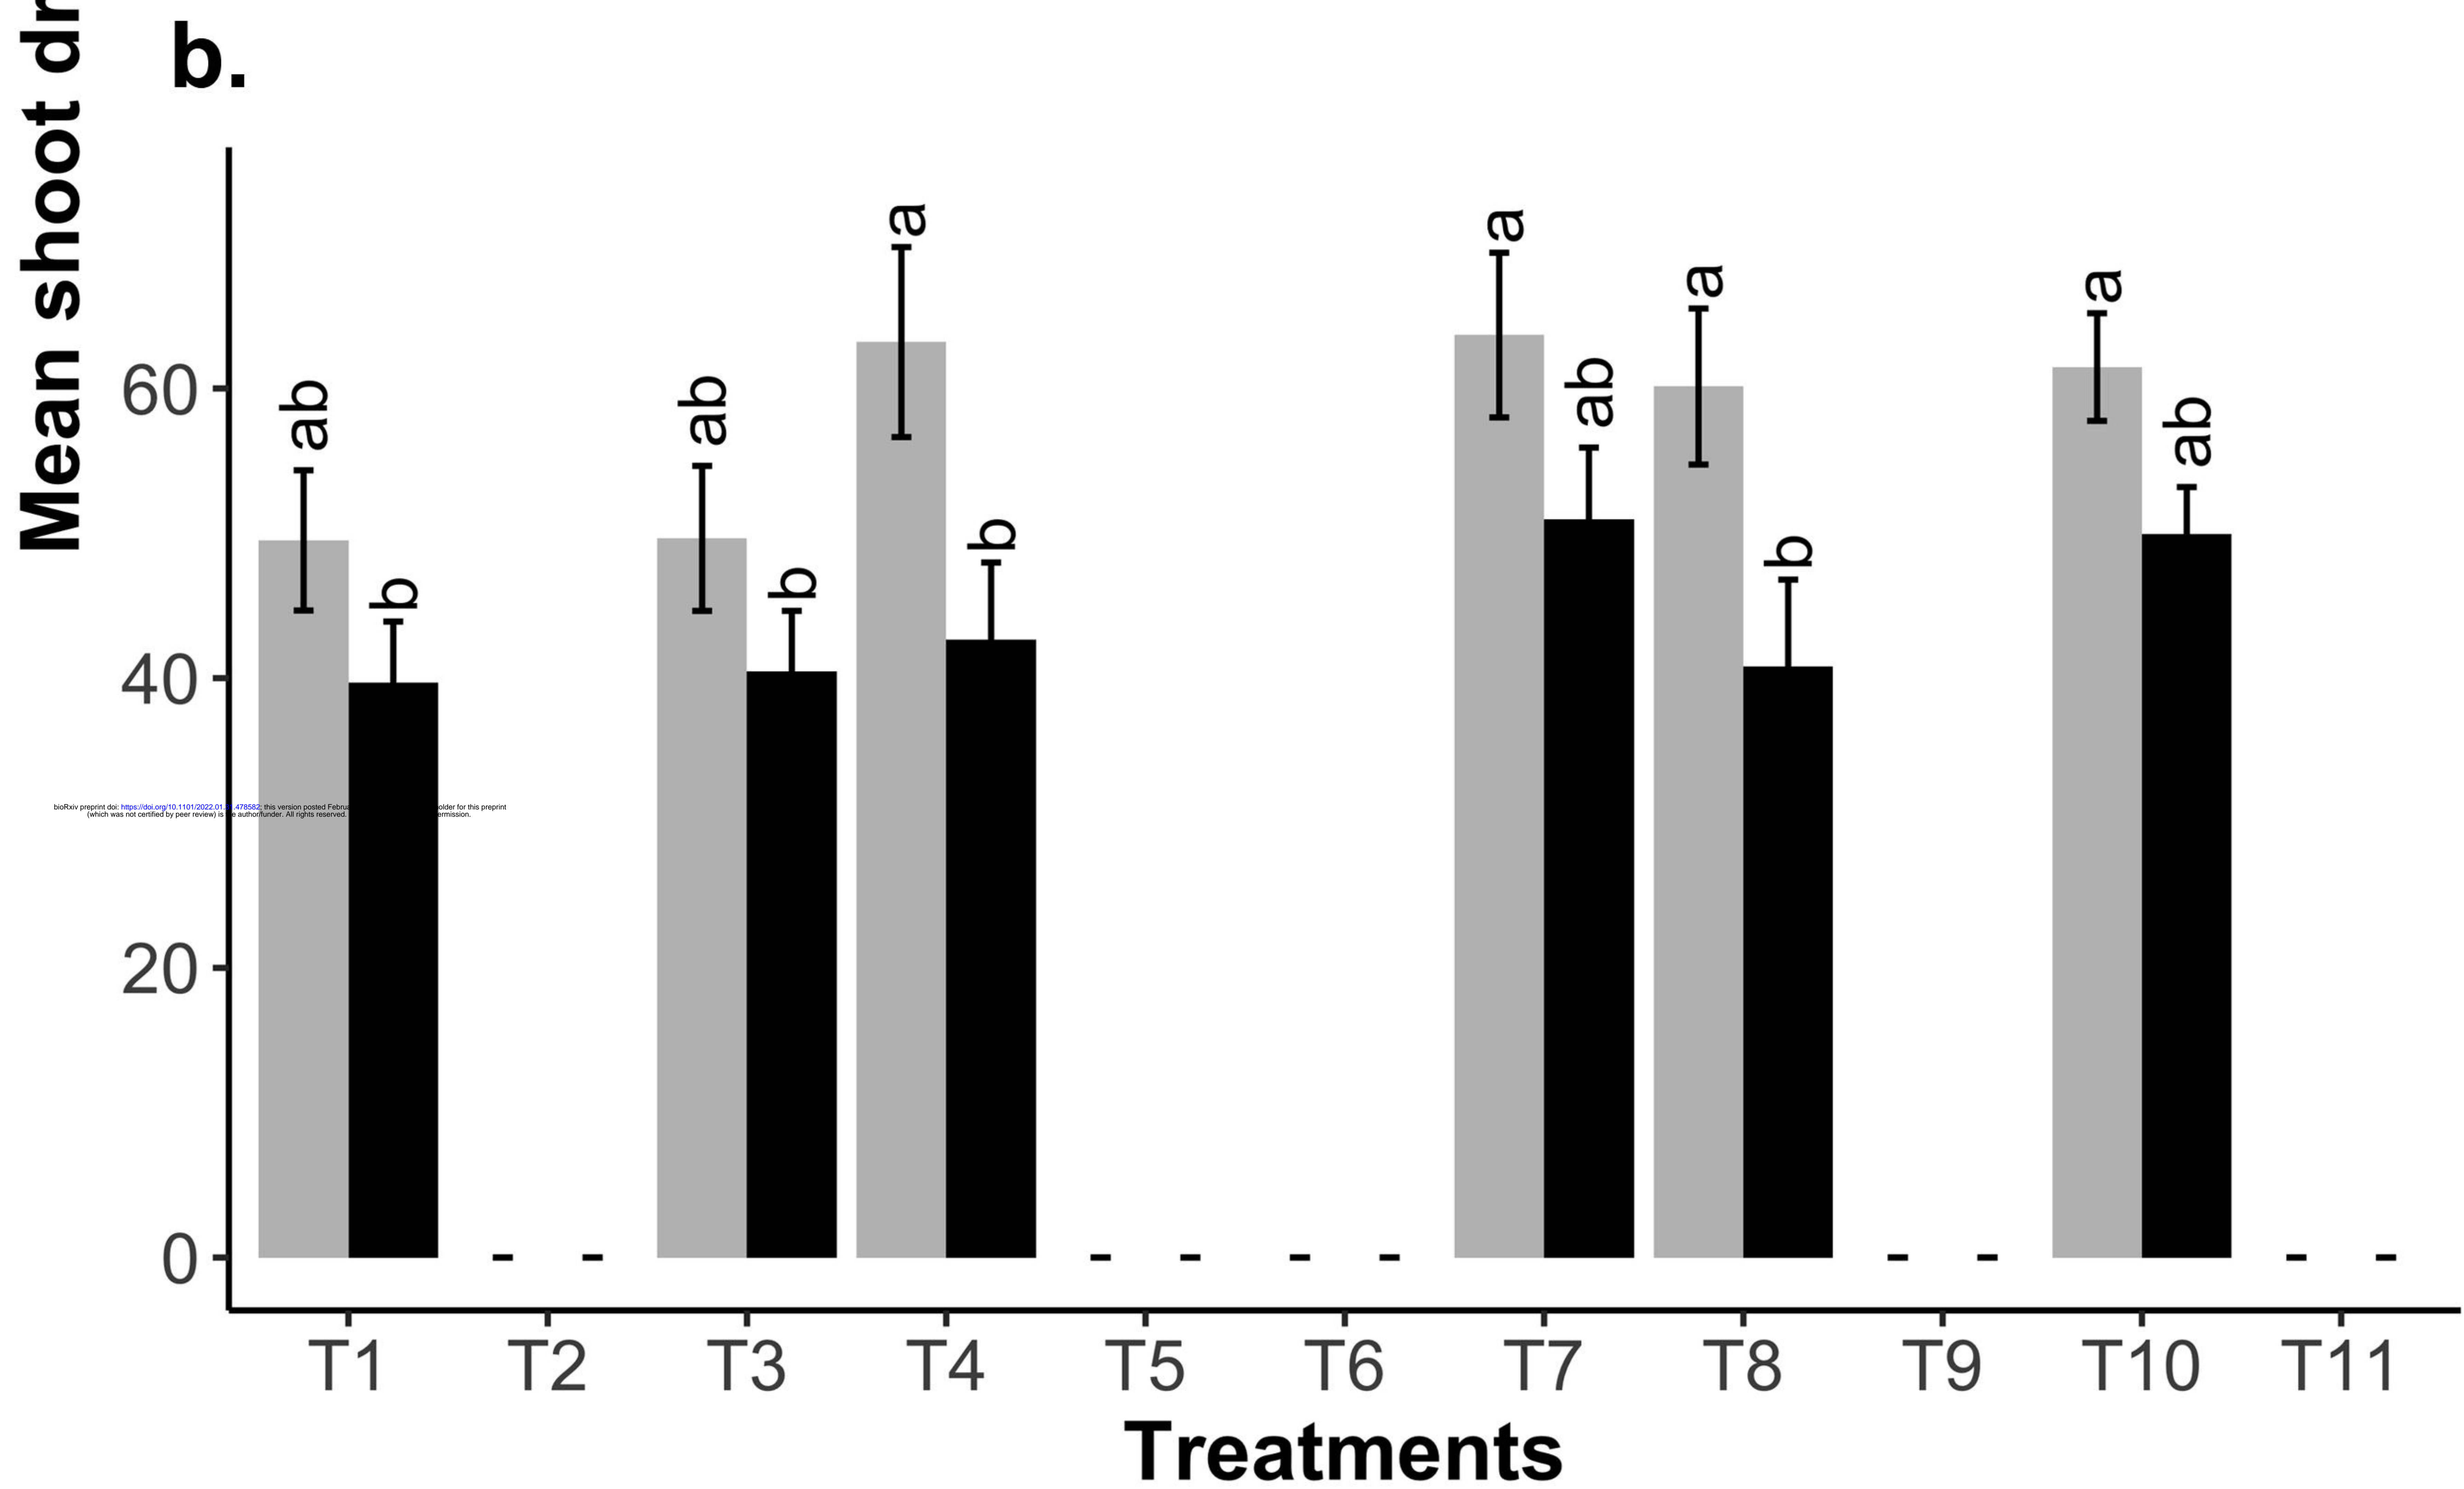

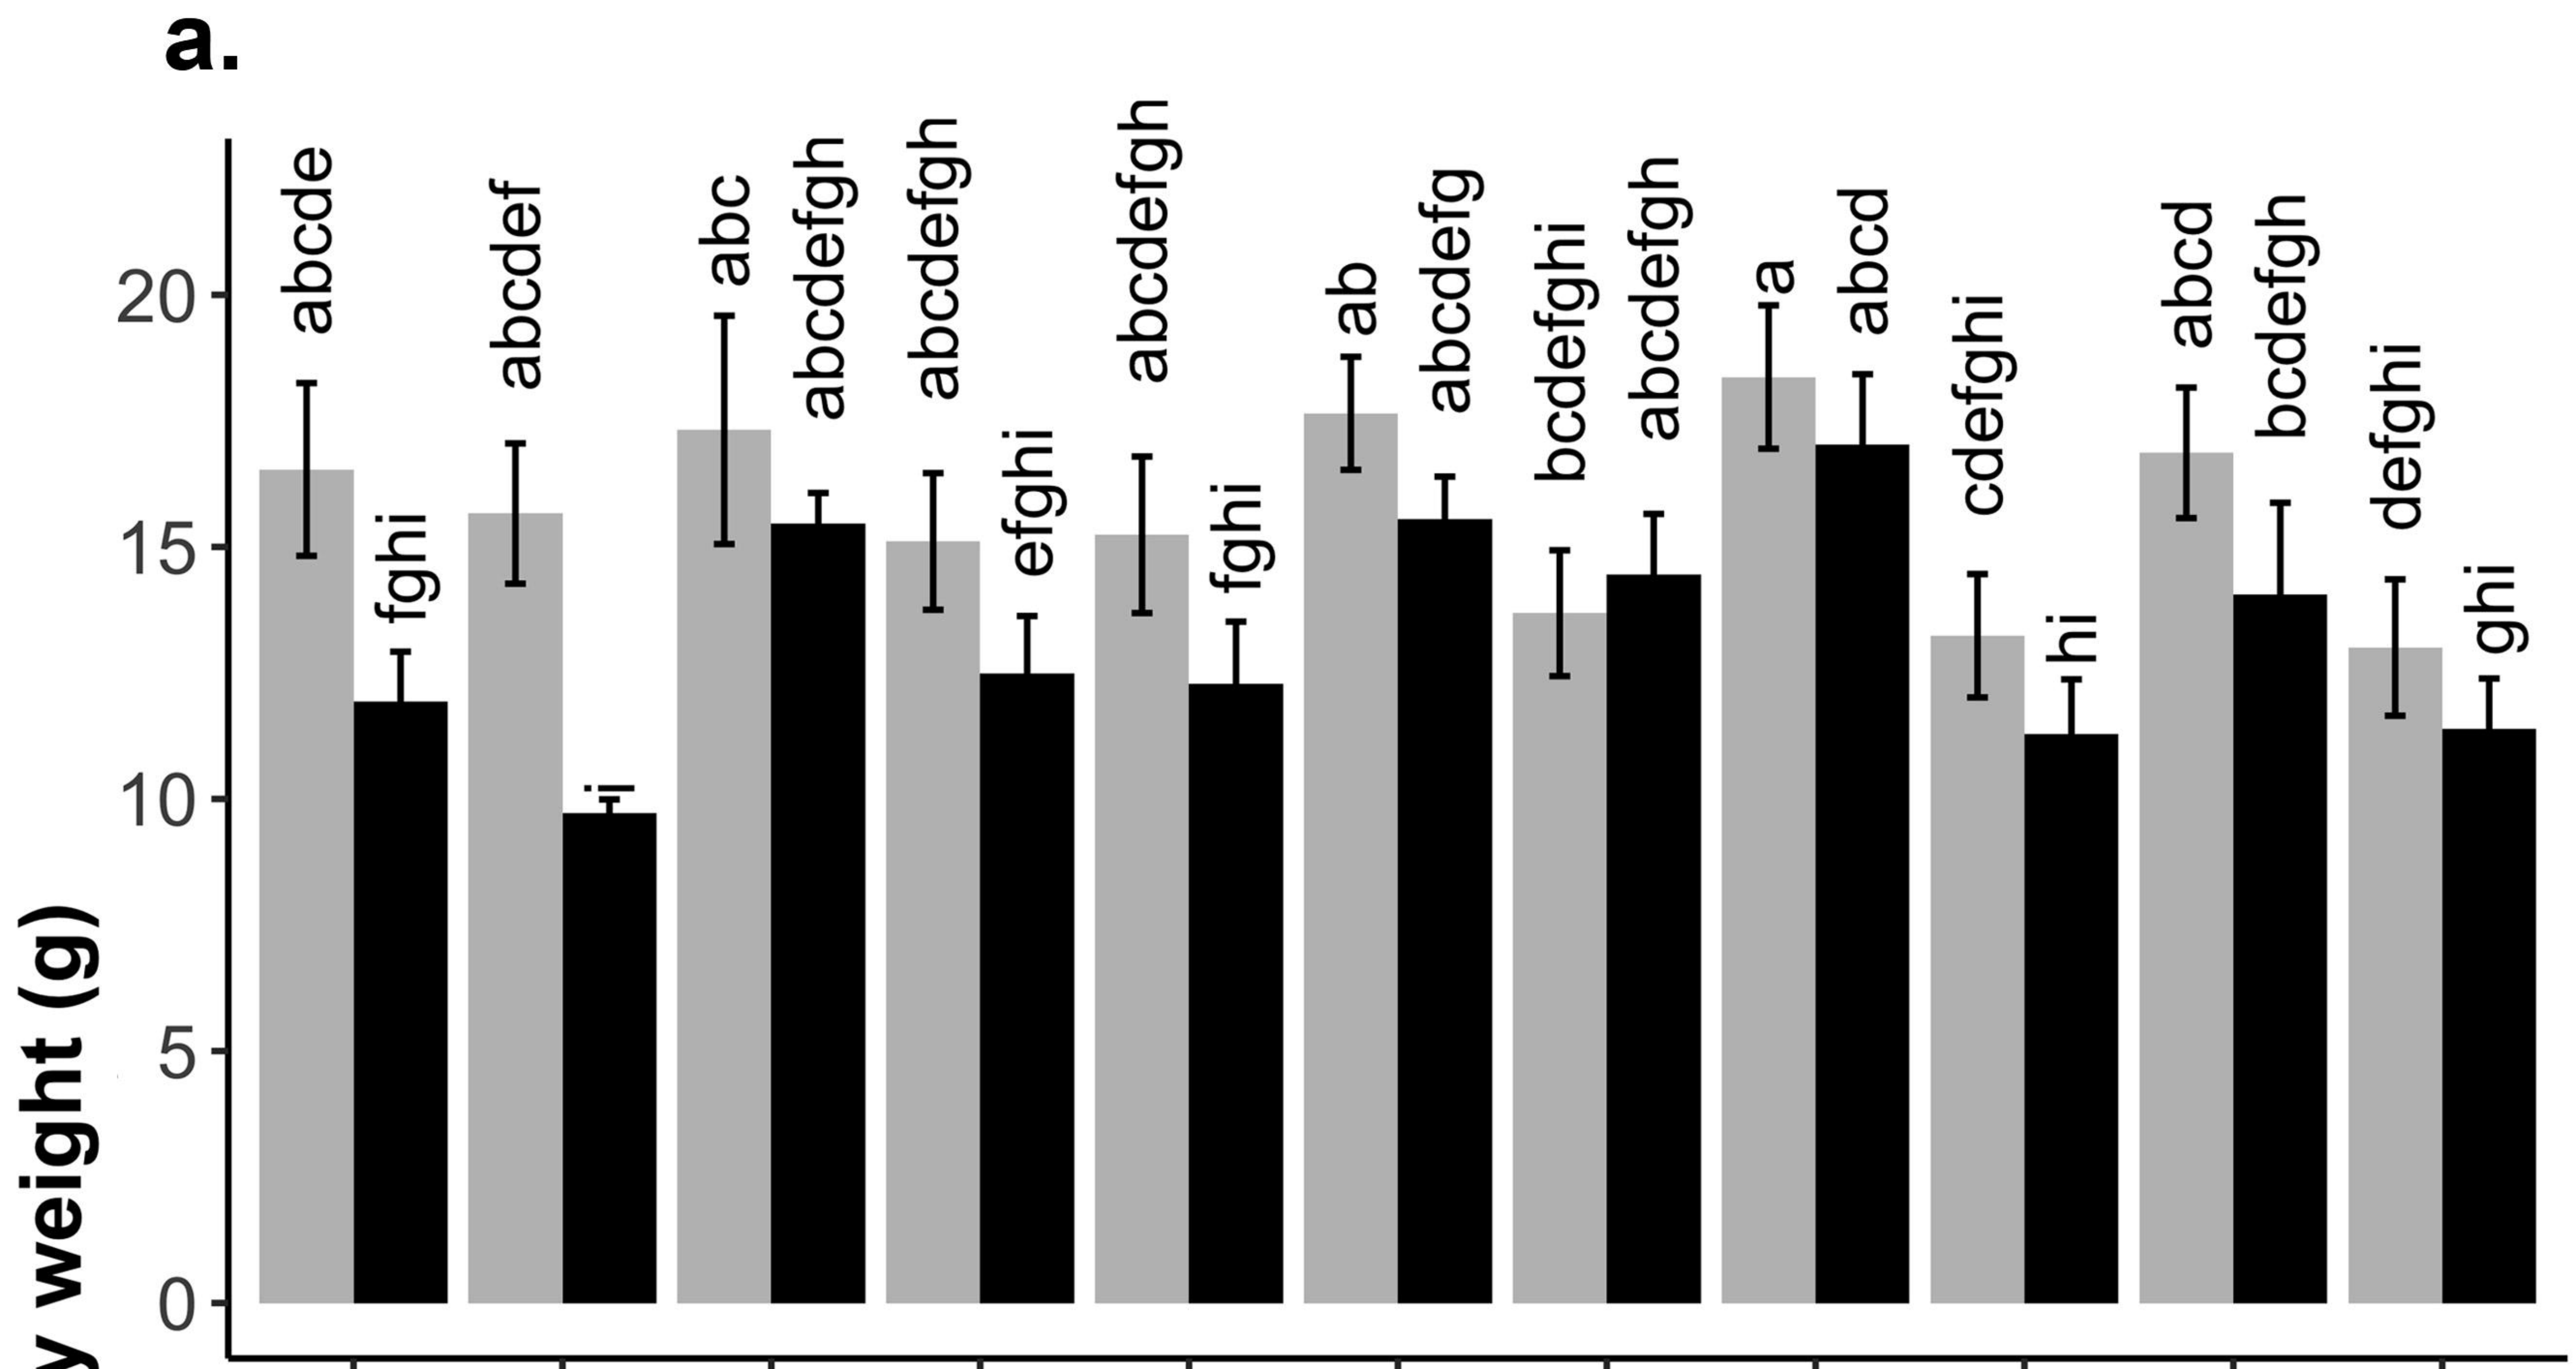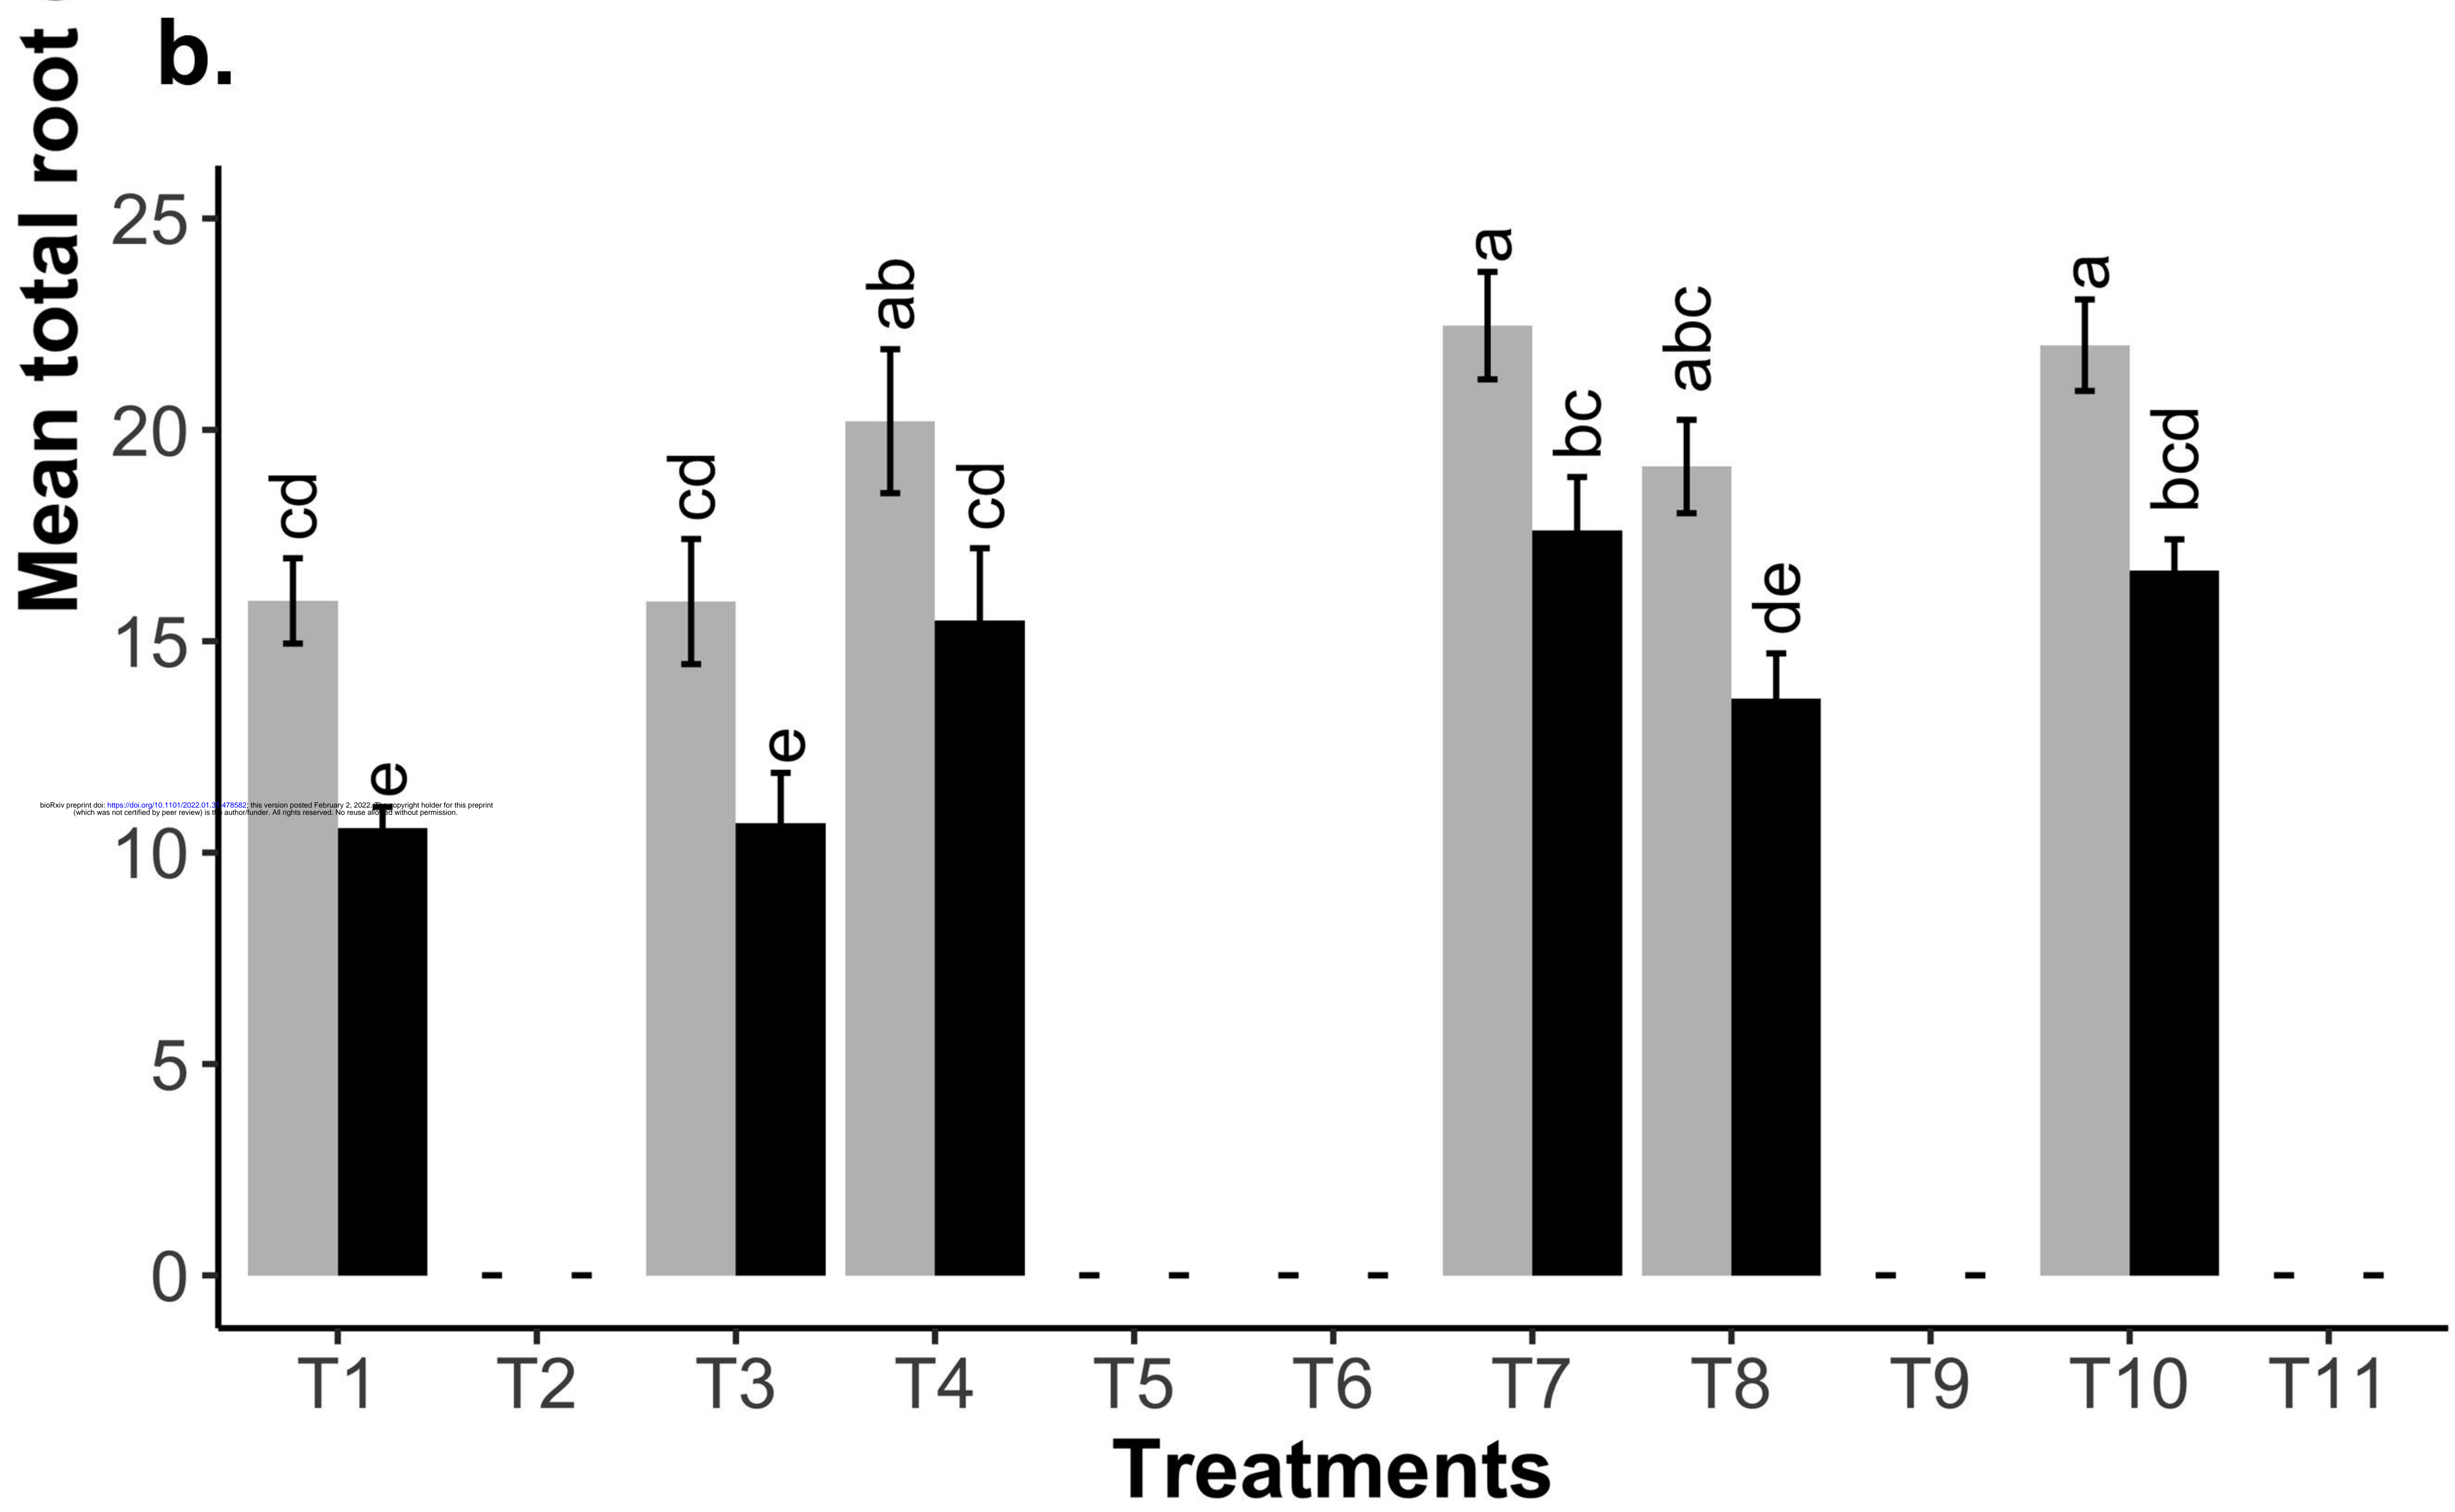

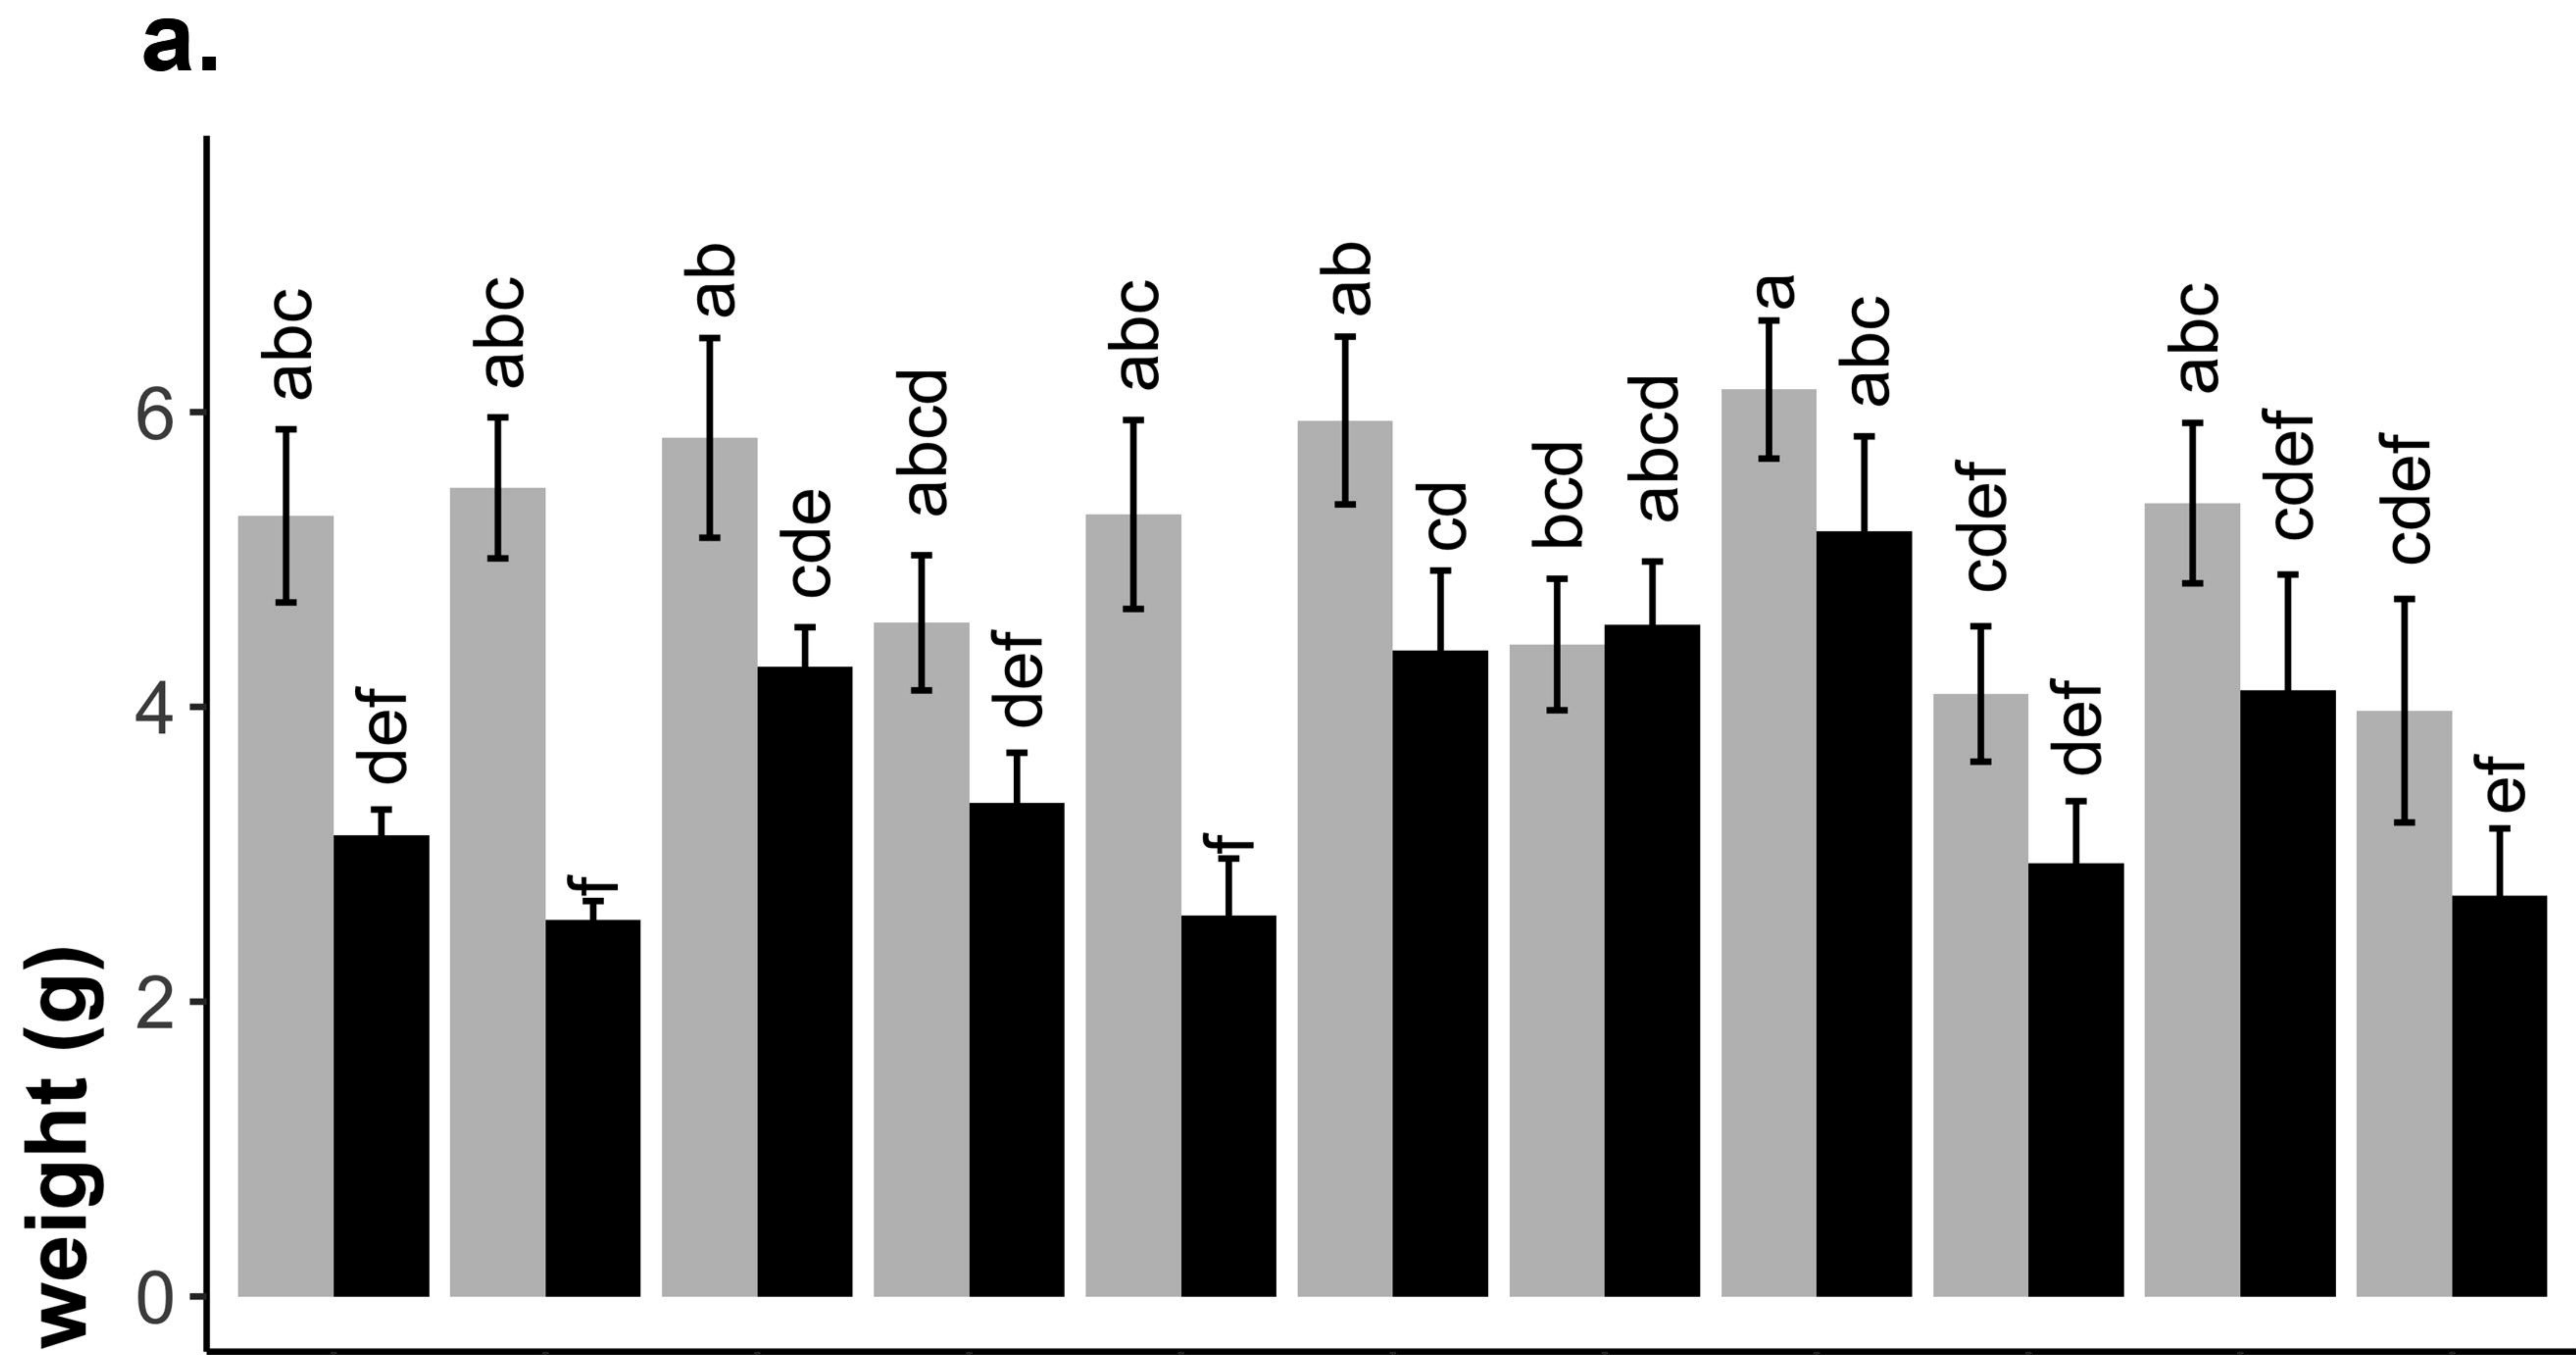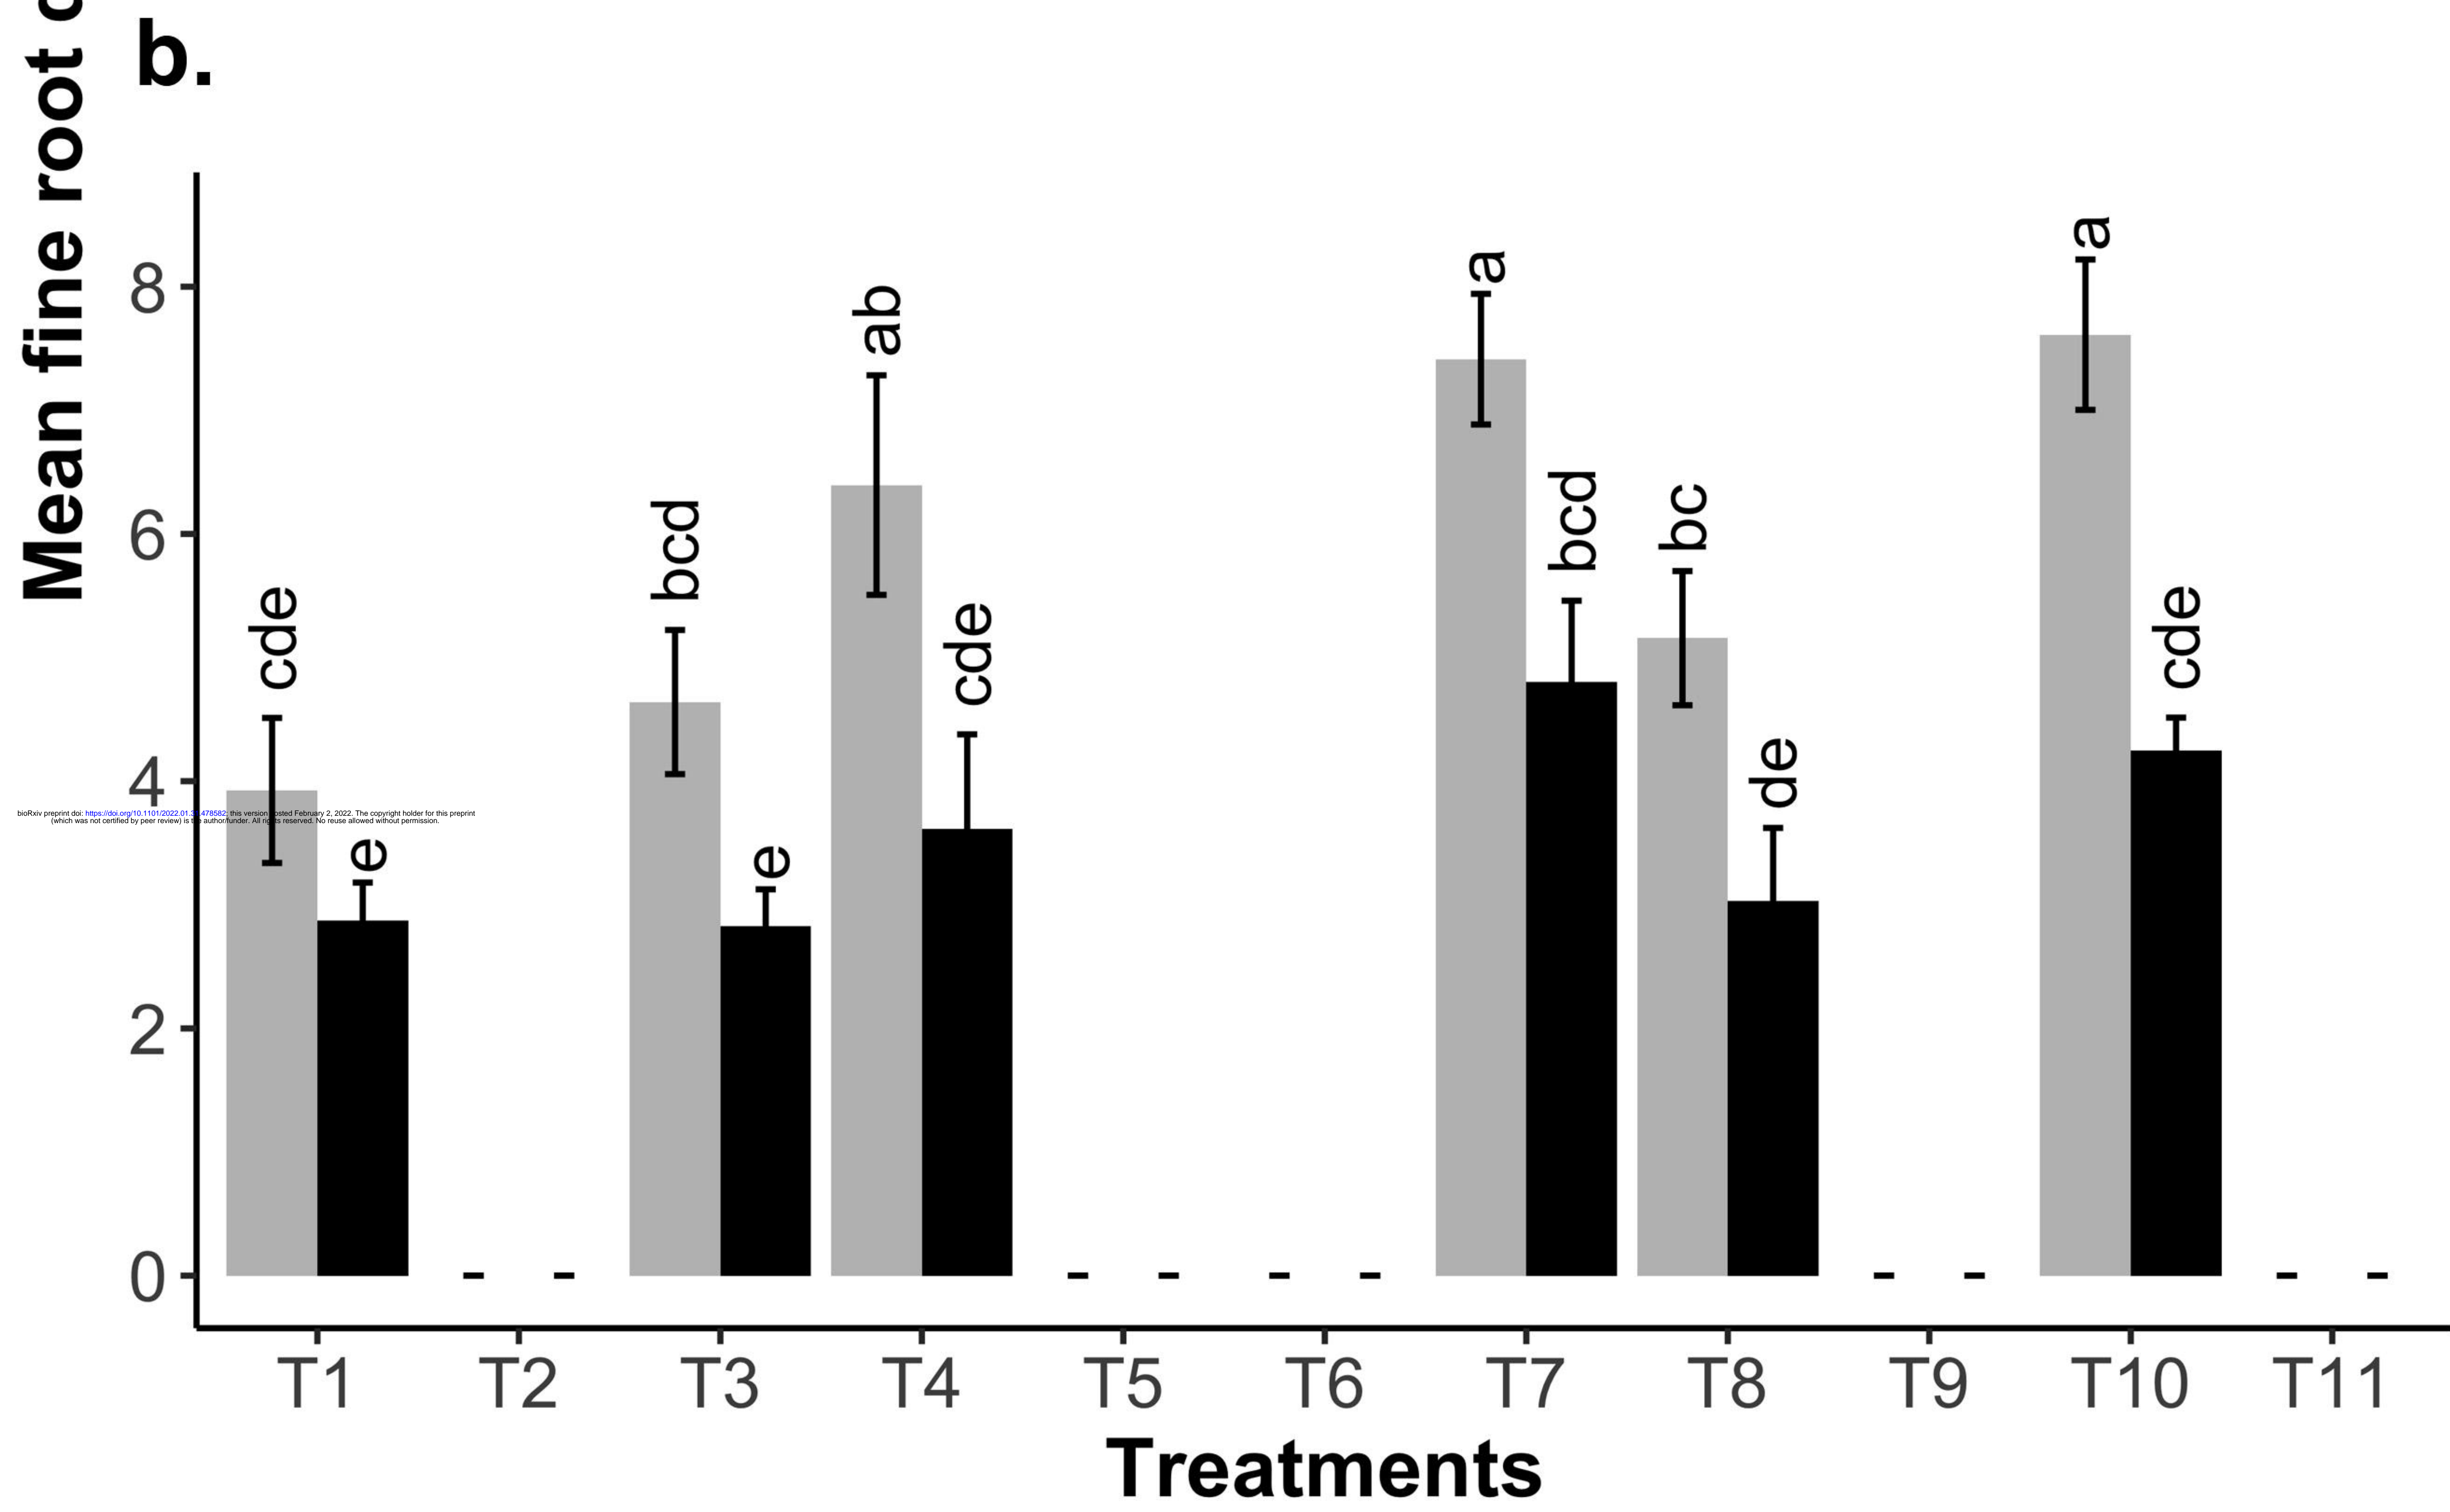

**a.**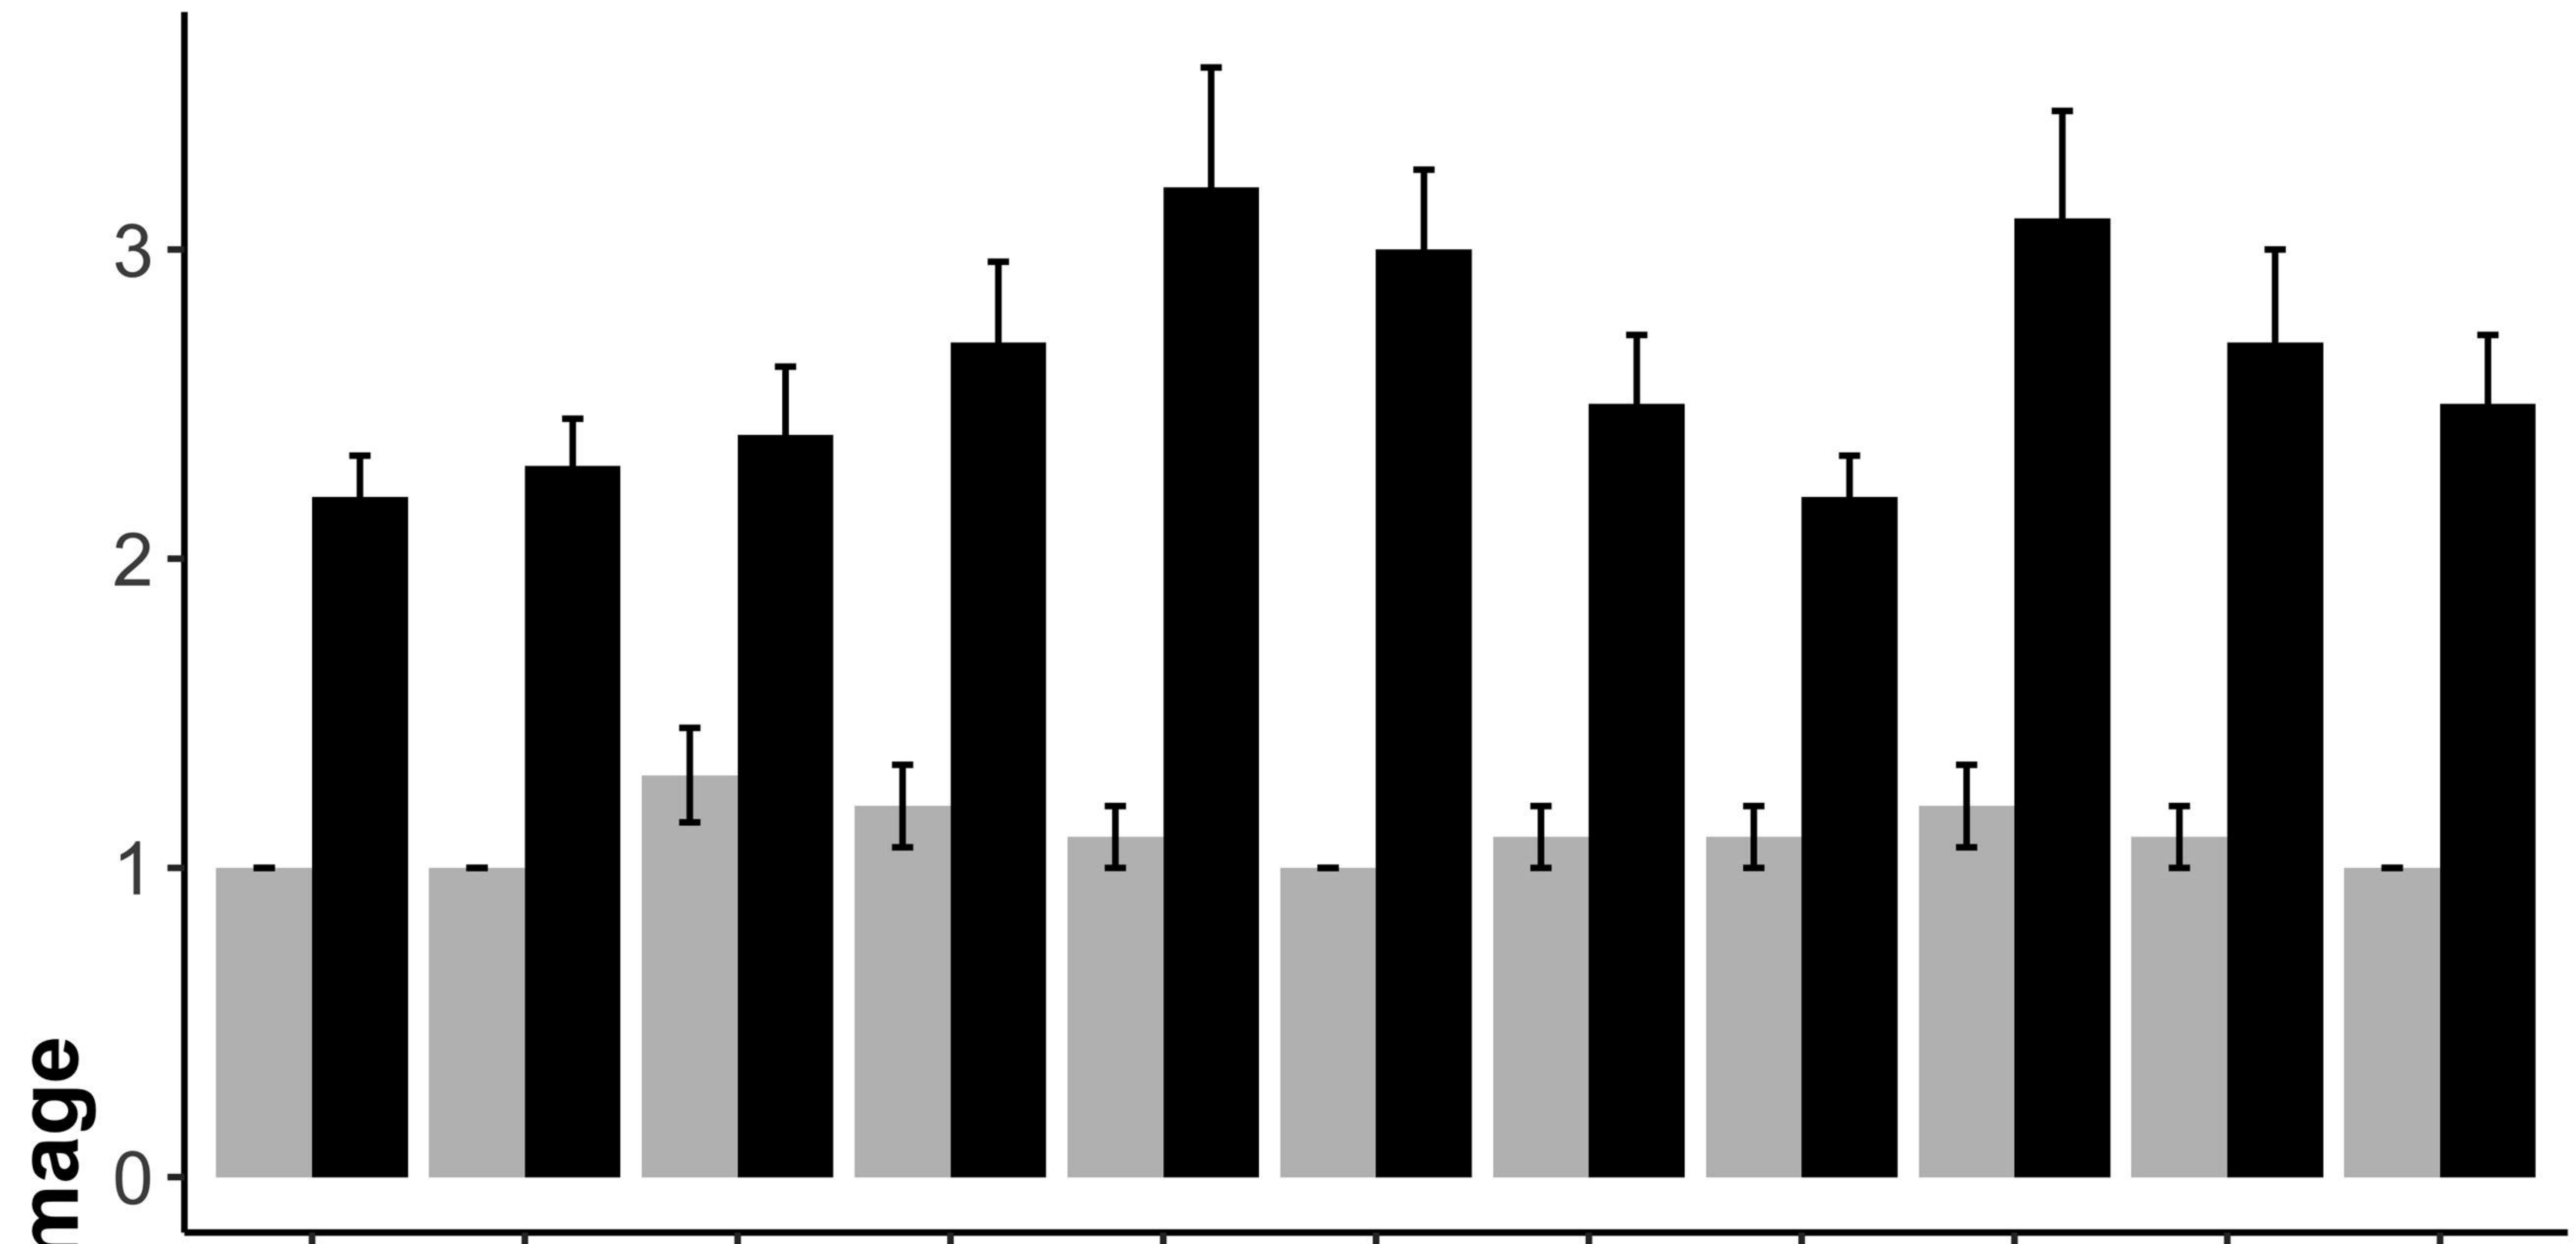**b.**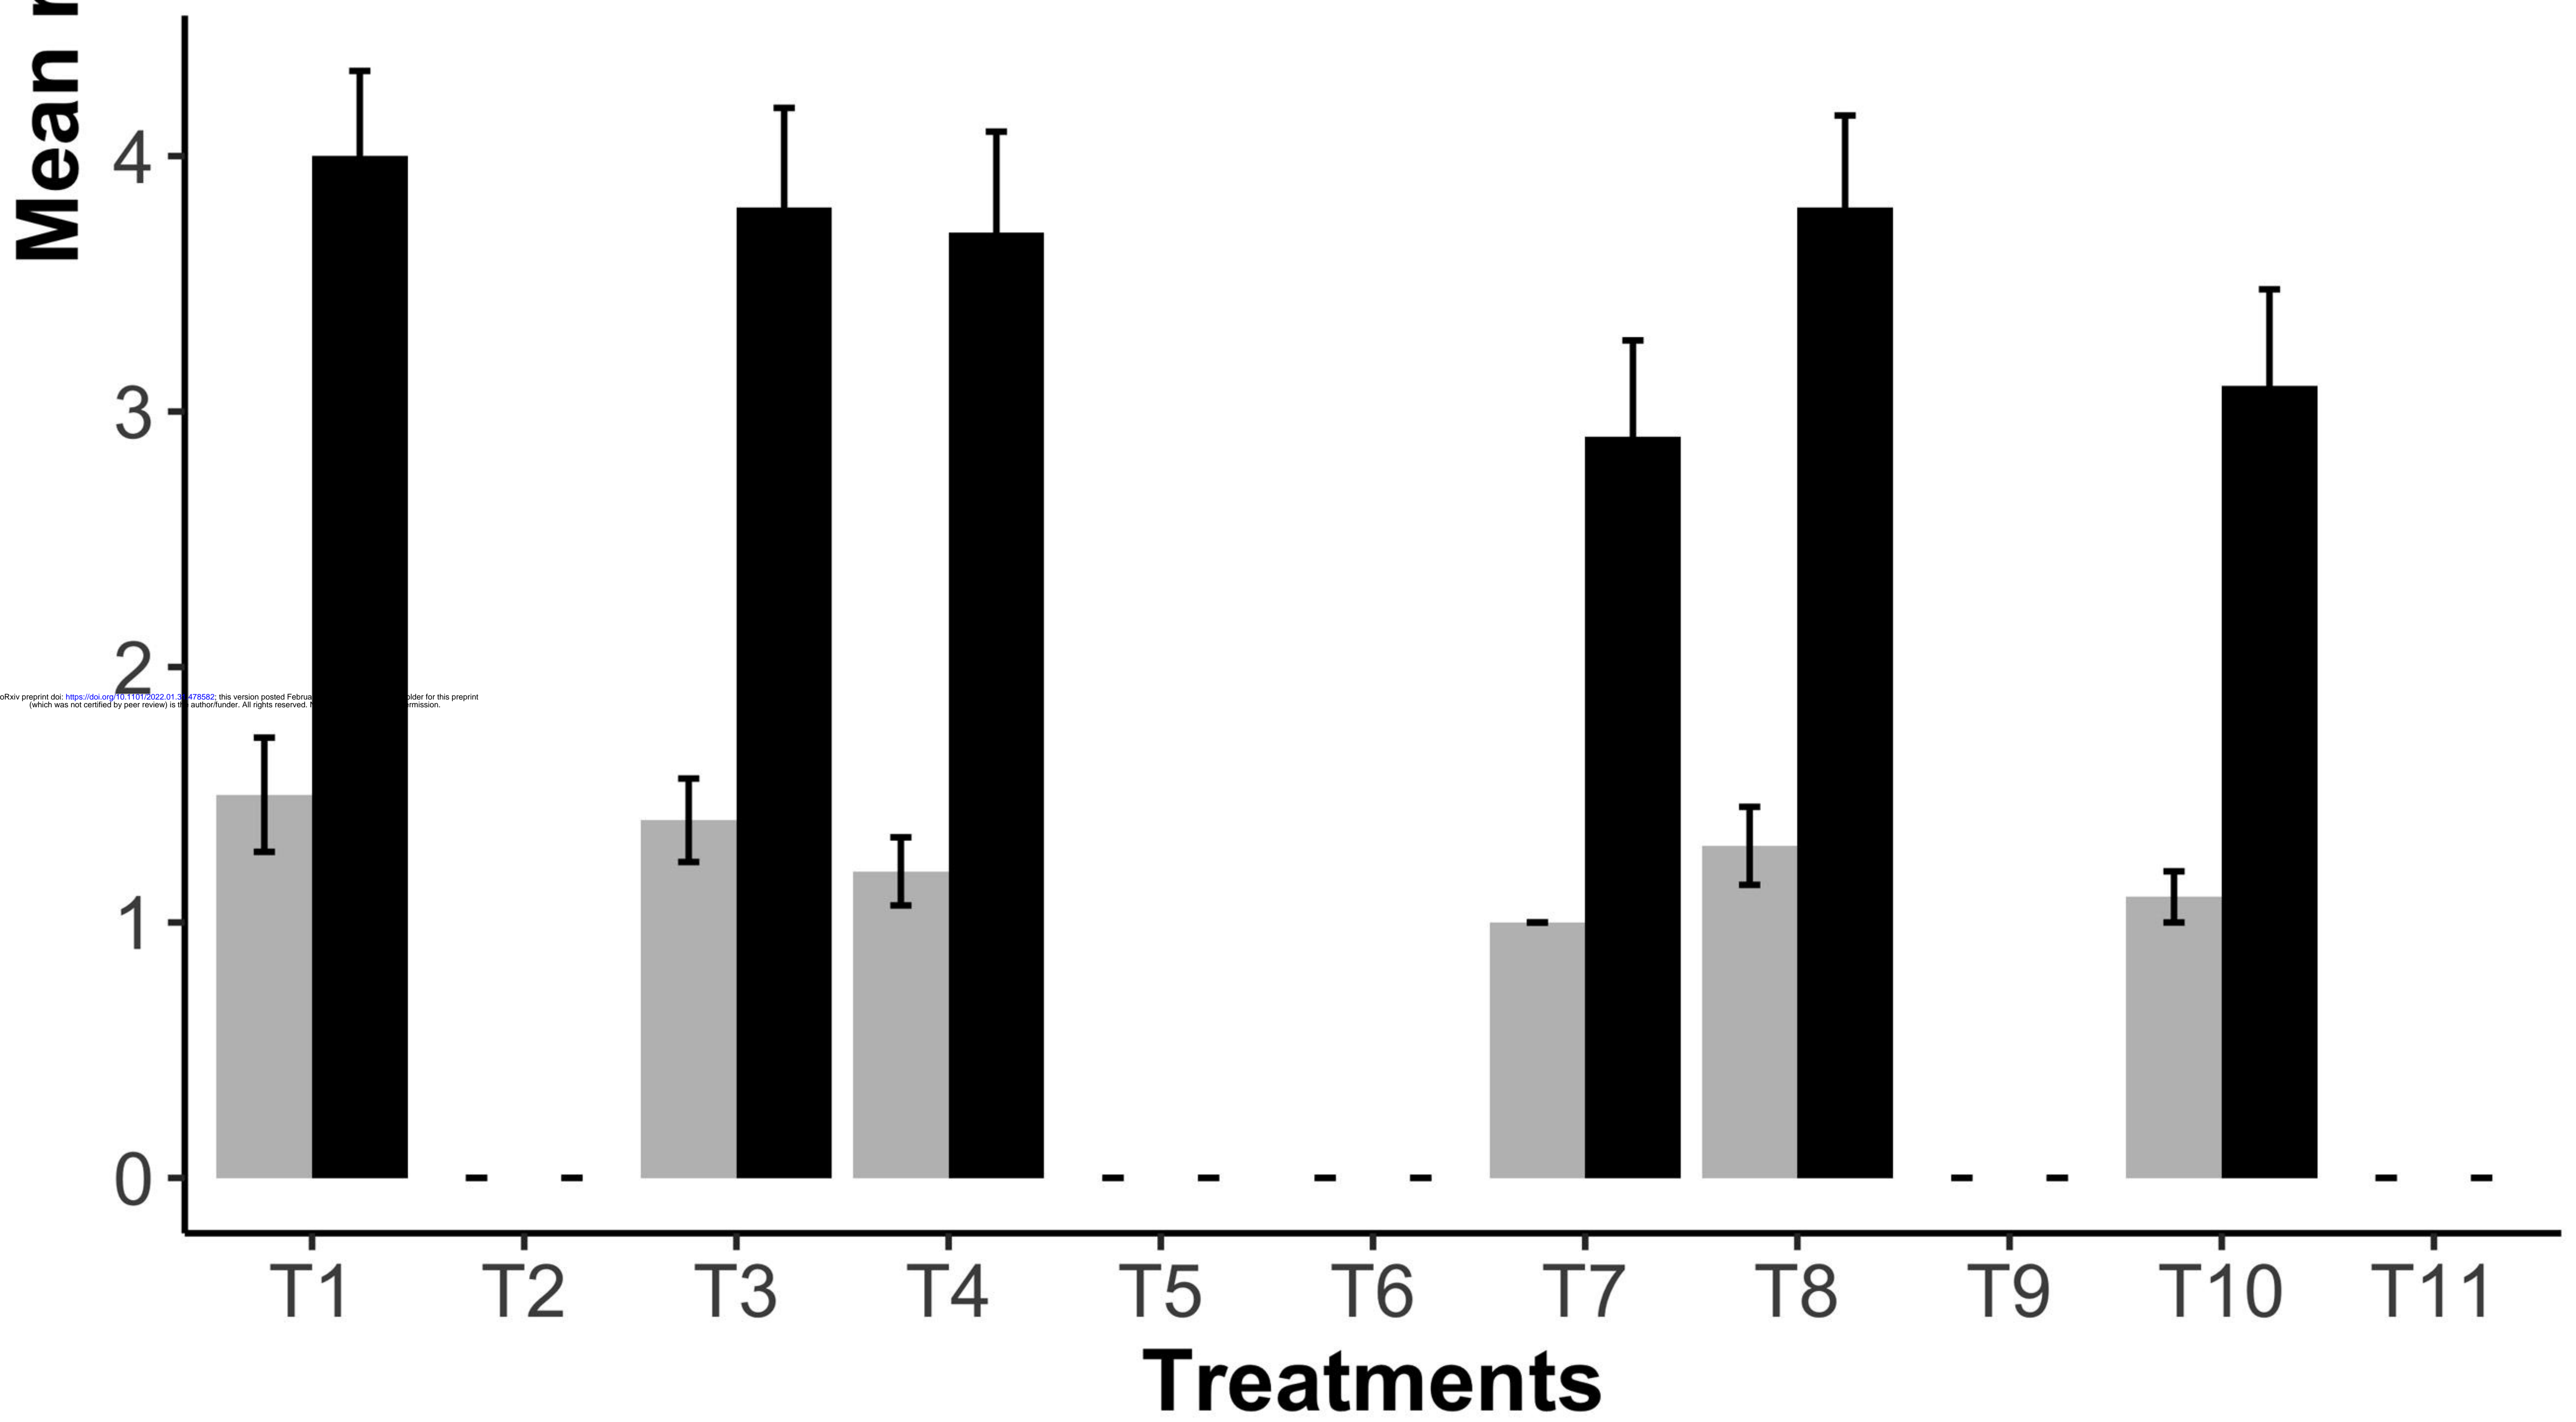

Source: http://biorxiv.org/content/10.1101/2022.01.31.478582v1.full.pdf
